# Supplementary material for: pKa prediction of per- and polyfluoroalkyl acids in water using in silico gas phase stretching vibrational frequencies and infrared intensities
Source: Royal Society of Chemistry journal article supplement (doi:10.1039/d3cp01390a), 2023-01-01
Supplement: d3cp01390a1.pdf [file d3cp01390a1.pdf]

## **pKa Prediction of Per- and Polyfluoroalkyl Acids in Water Using *in silico* Gas Phase Stretching Vibrational Frequencies and Infrared Intensities**

*Jimmy Murillo-Gelvez*<sup>1</sup>, *Olga Dmitrenko*<sup>2</sup>, *Tiffany L. Torralba-Sanchez*<sup>3</sup>, *Paul G. Tratnyek*<sup>4</sup>, *Dominic M. Di Toro*<sup>1\*</sup>

<sup>1</sup>Department of Civil and Environmental Engineering, University of Delaware, Newark, DE 19716

<sup>2</sup>Department of Chemistry and Biochemistry, University of Delaware, Newark, DE 19716

<sup>3</sup>Mutch Associates LLC, Hawthorne, NY 10532

<sup>4</sup>OHSU-PSU School of Public Health, Oregon Health & Science University, Portland, OR 97239

\*Corresponding Author Email: [dditoro@udel.edu](mailto:dditoro@udel.edu)  
Phone: +1 302-831-4092

### **Supporting Information I**

#### **Summary (33 Pages, 16 Tables, 9 Figures)**

|                                                                                                                                                                                                                                                                                                                                    |    |
|------------------------------------------------------------------------------------------------------------------------------------------------------------------------------------------------------------------------------------------------------------------------------------------------------------------------------------|----|
| Table S1. pKa, COO <sup>-</sup> antisymmetric stretching vibrational frequency of the carboxylate anion ( $\nu_{\text{COO}^-}$ ), OH stretching vibrational frequency ( $\nu_{\text{OH}}$ ), and corresponding infrared intensities ( $\text{IR}_{\text{Int}}$ ) of the carboxylic acids in the training and validation sets ..... | 3  |
| Table S2. Individual QSARs developed for $\nu_{\text{OH}}$ and $\nu_{\text{COO}^-}$ .....                                                                                                                                                                                                                                          | 9  |
| Table S3. QSARs developed with $\nu_{\text{OH}}$ and $\nu_{\text{COO}^-}$ and their corresponding $\text{IR}_{\text{Int}}$ .....                                                                                                                                                                                                   | 9  |
| Table S4. Symmetric ( $\nu_{\text{COO}^-, \text{sym}}$ ) and antisymmetric ( $\nu_{\text{COO}^-}$ ) COO <sup>-</sup> stretching vibrational frequencies and corresponding infrared intensities calculated using different functionals and basis sets for the first 59 carboxylic acids listed in Table S1. ....                    | 10 |
| Table S5. QSARs developed with $\nu_{\text{COO}^-}$ and their corresponding $\text{IR}_{\text{Int}}$ using different functionals and basis sets. ....                                                                                                                                                                              | 12 |
| Table S6. Experimental pKa of perfluoroalkyl carboxylic acids. ....                                                                                                                                                                                                                                                                | 13 |
| Table S7. pKa, COO <sup>-</sup> antisymmetric stretching vibrational frequencies of the carboxylate anions ( $\nu_{\text{COO}^-}$ ), and corresponding infrared intensities ( $\text{IR}_{\text{Int}}$ ) of selected betaines. ....                                                                                                | 14 |
| Table S8. pKa and SO <sub>3</sub> <sup>-</sup> antisymmetric stretching vibrational frequencies ( $\nu_{\text{SO}_3^-}$ ) of selected sulfonic acids. ....                                                                                                                                                                         | 14 |

|                                                                                                                                                                                                                                                                                                                                                                                                                                                            |    |
|------------------------------------------------------------------------------------------------------------------------------------------------------------------------------------------------------------------------------------------------------------------------------------------------------------------------------------------------------------------------------------------------------------------------------------------------------------|----|
| Table S9. pKa, $\text{HPO}_3^-$ antisymmetric stretching vibrational frequencies ( $\nu\text{HPO}_3^-$ ), and corresponding infrared intensities ( $\text{IR}_{\text{Int}}$ ) of selected phosphonic acids. Experimental pKa taken from refs. <sup>23,24</sup> .....                                                                                                                                                                                       | 15 |
| Table S10. pKa, $\text{SO}_2^-$ stretching vibrational frequencies ( $\nu\text{SO}_2^-$ ), and corresponding infrared intensities ( $\text{IR}_{\text{Int}}$ ) of selected sulfonamides. ....                                                                                                                                                                                                                                                              | 16 |
| Table S11. pKa, OH stretching vibrational frequencies ( $\nu\text{OH}$ ), $\text{CO}^-$ stretching vibrational frequencies ( $\nu\text{CO}^-$ ), and corresponding infrared intensities ( $\text{IR}_{\text{Int}}$ ) of selected alcohols. ....                                                                                                                                                                                                            | 16 |
| Table S12. Estimated pKa of fluorinated betaines compiled from different models/sources and calculated using the Betaines QSAR. ....                                                                                                                                                                                                                                                                                                                       | 19 |
| Table S13. Estimated pKa of per- and polyfluoroalkyl sulfonic acids compiled from different models/sources and calculated using the Sulfonic Acids QSAR. ....                                                                                                                                                                                                                                                                                              | 19 |
| Table S14. Estimated pKa of PFPA compiled from different models/sources and calculated using the Phosphonic Acids QSAR. ....                                                                                                                                                                                                                                                                                                                               | 20 |
| Table S15. Estimated pKa of sulfonamides compiled from different models/sources and calculated using the Sulfonamides QSAR. ....                                                                                                                                                                                                                                                                                                                           | 20 |
| Table S16. Estimated pKa of FTOH compiled from different models/sources and calculated using the $\nu\text{FTOH}$ QSAR. ....                                                                                                                                                                                                                                                                                                                               | 21 |
| Figure S1. Linear correlations between the pKa of a subset of carboxylic acids (#1-59; Table S1) and a) the stretching OH vibrational frequency ( $\nu_{\text{OH}}$ ), b) the infrared intensity ( $\text{IR}_{\text{Int}}$ ) of the corresponding $\nu_{\text{OH}}$ , c) the antisymmetric stretching $\text{COO}^-$ vibrational frequency ( $\nu_{\text{COO}^-}$ ), and d) the $\text{IR}_{\text{Int}}$ of the corresponding $\nu_{\text{COO}^-}$ . .... | 22 |
| Figure S2. Vibrational frequency and $\text{IR}_{\text{Int}}$ for the antisymmetric $\text{COO}^-$ stretch of fluoroacetate .....                                                                                                                                                                                                                                                                                                                          | 23 |
| Figure S3. Correlation between the experimental and calculated pKa of a subset of carboxylic acids (Table S4) using as predictors symmetric $\text{COO}^-$ stretching vibrational frequencies ( $\nu_{\text{COO}^-, \text{sym}}$ ) and corresponding $\text{IR}_{\text{Int}}$ . ....                                                                                                                                                                       | 24 |
| Figure S4. Correlations between calculated and experimental pKa of a subset of carboxylic acids (#1-59, Table S1) using different functionals and basis sets. $\text{COO}^-$ vibrational frequencies ( $\nu_{\text{COO}^-}$ ) and corresponding infrared intensities ( $\text{IR}_{\text{Int}}$ ) were used as predictors .....                                                                                                                            | 25 |
| Figure S5. Correlation between experimental and calculated pKa of the alkyl carboxylic acids in the validation set (n = 67) .....                                                                                                                                                                                                                                                                                                                          | 26 |
| Figure S6. Experimental and calculated pKa of non-fluorinated alkyl carboxylic acids with chain lengths of one (formic acid) to eight (octanoic acid) carbons. ....                                                                                                                                                                                                                                                                                        | 27 |
| Figure S7. Experimental pKa of selected fluorinated carboxylic acids found in Table S1. ....                                                                                                                                                                                                                                                                                                                                                               | 28 |
| Figure S8. Correlations between calculated and experimental pKa of different acids .....                                                                                                                                                                                                                                                                                                                                                                   | 29 |
| Figure S9. Correlation between calculated and experimental pKa of the 39 alcohols listed in Table S11. The QSAR was developed with non-fluorinated alcohols (n: 21) and used to predict the pKa of fluorinated alcohols (n: 18) .....                                                                                                                                                                                                                      | 30 |
| References .....                                                                                                                                                                                                                                                                                                                                                                                                                                           | 31 |

**Table S1.** pKa, COO<sup>-</sup> antisymmetric stretching vibrational frequency of the carboxylate anion ( $\nu_{\text{COO}^-}$ ), OH stretching vibrational frequency ( $\nu_{\text{OH}}$ ), and corresponding infrared intensities (IR<sub>int</sub>) of the carboxylic acids in the training and validation sets. Experimental pKa taken from refs.<sup>1-5</sup>

| #  | Chemical                        | CAS #      | Exp. pKa | $\nu_{\text{COO}^-}$ (cm <sup>-1</sup> ) | IR <sub>int, COO<sup>-</sup></sub> | $\nu_{\text{OH}}$ (cm <sup>-1</sup> ) | IR <sub>int, OH</sub> |
|----|---------------------------------|------------|----------|------------------------------------------|------------------------------------|---------------------------------------|-----------------------|
| 1  | 4-Methoxybenzoic acid           | 100-09-4   | 4.49     | 1725.540                                 | 535.207                            | 3825.220                              | 125.920               |
| 2  | Butanoic acid                   | 107-92-6   | 4.82     | 1698.870                                 | 677.088                            | 3816.470                              | 85.466                |
| 3  | 4-Mercaptobenzoic acid          | 1074-36-8  | 4.06     | 1731.060                                 | 523.864                            | 3821.760                              | 135.108               |
| 4  | Pentanoic acid                  | 109-52-4   | 4.70     | 1700.975                                 | 675.924                            | 3814.880                              | 86.504                |
| 5  | 2-Formylbenzoic acid            | 119-67-5   | 4.50     | 1727.260                                 | 509.019                            | 3818.750                              | 136.419               |
| 6  | 3-Nitrobenzoic acid             | 121-92-6   | 3.50     | 1746.420                                 | 543.677                            | 3813.280                              | 139.378               |
| 7  | 4-Sulfamoylbenzoic acid         | 138-41-0   | 3.63     | 1743.100                                 | 505.714                            | 3816.740                              | 140.795               |
| 8  | 4-Aminobenzoic acid             | 150-13-0   | 4.78     | 1723.290                                 | 529.236                            | 3826.260                              | 123.626               |
| 9  | 4-(Methoxycarbonyl)benzoic acid | 1679-64-7  | 3.74     | 1734.710                                 | 527.406                            | 3819.280                              | 135.401               |
| 10 | 3-Cyanobenzoic acid             | 1877-72-1  | 3.59     | 1743.890                                 | 511.953                            | 3813.317                              | 139.267               |
| 11 | 2-(Methylsulfinyl)benzoic acid  | 19093-34-6 | 3.10     | 1733.750                                 | 620.913                            | 3818.018                              | 139.417               |
| 12 | 4-(Methylsulfinyl)benzoic acid  | 33963-58-5 | 3.66     | 1737.560                                 | 511.256                            | 3820.499                              | 137.879               |
| 13 | Cyanoacetic acid                | 372-09-8   | 2.46     | 1764.450                                 | 669.177                            | 3812.438                              | 116.332               |
| 14 | 3-Phenoxybenzoic acid           | 3739-38-6  | 3.95     | 1735.480                                 | 482.105                            | 3825.839                              | 134.917               |
| 15 | 2-Cyanobenzoic acid             | 3839-22-3  | 3.10     | 1750.110                                 | 518.735                            | 3818.643                              | 137.633               |
| 16 | 2,6-Difluorobenzoic acid        | 385-00-2   | 2.24     | 1762.520                                 | 684.898                            | 3808.246                              | 119.980               |
| 17 | 4-(Methylsulfonyl)benzoic acid  | 4052-30-6  | 3.48     | 1742.530                                 | 505.246                            | 3817.414                              | 142.488               |
| 18 | 3-Trifluoromethylbenzoic acid   | 454-92-2   | 3.75     | 1739.150                                 | 526.043                            | 3821.812                              | 132.801               |
| 19 | 3-Fluorobenzoic acid            | 455-38-9   | 3.88     | 1734.250                                 | 478.415                            | 3816.155                              | 126.967               |
| 20 | 4-Fluorobenzoic acid            | 456-22-4   | 4.16     | 1731.500                                 | 531.588                            | 3819.982                              | 125.734               |
| 21 | 3-Mercaptobenzoic acid          | 4869-59-4  | 3.96     | 1733.790                                 | 477.348                            | 3823.832                              | 129.319               |
| 22 | 3,5-Dimethylbenzoic acid        | 499-06-9   | 4.30     | 1726.920                                 | 431.772                            | 3822.139                              | 121.807               |
| 23 | 2,6-Dichlorobenzoic acid        | 50-30-6    | 1.59     | 1762.240                                 | 582.985                            | 3793.861                              | 114.113               |
| 24 | 3,4-Dichlorobenzoic acid        | 51-44-5    | 3.64     | 1741.390                                 | 491.734                            | 3822.266                              | 141.768               |
| 25 | 3-(Methylsulfonyl)benzoic acid  | 5345-27-7  | 3.53     | 1743.310                                 | 502.950                            | 3817.838                              | 137.758               |
| 26 | 3-Chlorobenzoic acid            | 535-80-8   | 3.84     | 1736.220                                 | 482.623                            | 3820.363                              | 131.418               |
| 27 | 2-Nitrobenzoic acid             | 552-16-9   | 2.17     | 1759.530                                 | 557.358                            | 3806.788                              | 129.746               |

| #  | Chemical                         | CAS #      | Exp. pKa | $\nu_{COO^-}$ (cm <sup>-1</sup> ) | IR <sub>Int, COO<sup>-</sup></sub> | $\nu_{OH}$ (cm <sup>-1</sup> ) | IR <sub>Int, OH</sub> |
|----|----------------------------------|------------|----------|-----------------------------------|------------------------------------|--------------------------------|-----------------------|
| 28 | 4-Acetamidobenzoic acid          | 556-08-1   | 4.30     | 1729.460                          | 520.875                            | 3825.082                       | 133.365               |
| 29 | 2-Acetylbenzoic acid             | 577-56-0   | 4.13     | 1728.150                          | 608.074                            | 3820.802                       | 132.355               |
| 30 | 3-Bromobenzoic acid              | 585-76-2   | 3.86     | 1737.310                          | 476.151                            | 3822.121                       | 133.182               |
| 31 | 3-Methoxybenzoic acid            | 586-38-9   | 4.12     | 1729.530                          | 458.468                            | 3825.448                       | 124.279               |
| 32 | 3-Acetylbenzoic acid             | 586-42-5   | 3.86     | 1739.640                          | 495.870                            | 3818.959                       | 130.933               |
| 33 | 4-Bromobenzoic acid              | 586-76-5   | 3.99     | 1734.840                          | 522.175                            | 3819.100                       | 136.863               |
| 34 | 4-Acetylbenzoic acid             | 586-89-0   | 3.74     | 1735.490                          | 531.834                            | 3818.934                       | 134.735               |
| 35 | 3-Acetamidobenzoic acid          | 587-48-4   | 4.06     | 1734.660                          | 405.374                            | 3822.249                       | 125.350               |
| 36 | 2,3-Dibromopropanoic acid        | 600-05-5   | 2.36     | 1764.700                          | 552.026                            | 3808.293                       | 118.791               |
| 37 | 2,6-Dibromobenzoic acid          | 601-84-3   | 1.51     | 1764.200                          | 536.927                            | 3793.810                       | 116.142               |
| 38 | 2,6-Dinitrobenzoic acid          | 603-12-3   | 1.14     | 1794.620                          | 522.324                            | 3798.416                       | 148.067               |
| 39 | 3,4-Dimethylbenzoic acid         | 619-04-5   | 4.40     | 1725.570                          | 485.165                            | 3826.697                       | 124.725               |
| 40 | 4-Cyanobenzoic acid              | 619-65-8   | 3.50     | 1741.330                          | 517.545                            | 3816.336                       | 142.534               |
| 41 | 4-Formylbenzoic acid             | 619-66-9   | 3.72     | 1736.440                          | 518.745                            | 3818.820                       | 135.908               |
| 42 | 4-Nitrobenzoic acid              | 62-23-7    | 3.40     | 1743.060                          | 458.221                            | 3815.353                       | 141.284               |
| 43 | 3-Sulfamoylbenzoic acid          | 636-76-0   | 3.68     | 1744.060                          | 502.666                            | 3821.600                       | 137.287               |
| 44 | Acetic acid                      | 64-19-7    | 4.75     | 1693.520                          | 715.286                            | 3810.595                       | 83.581                |
| 45 | Benzoic acid                     | 65-85-0    | 4.21     | 1727.660                          | 511.177                            | 3823.486                       | 121.396               |
| 46 | 4-Chlorobenzoic acid             | 74-11-3    | 4.00     | 1733.840                          | 524.553                            | 3819.461                       | 133.740               |
| 47 | Propanoic acid                   | 79-09-4    | 4.88     | 1698.459                          | 672.894                            | 3817.262                       | 84.442                |
| 48 | Chloroacetic acid                | 79-11-8    | 2.85     | 1751.140                          | 590.810                            | 3800.521                       | 105.541               |
| 49 | Hydroxyacetic acid               | 79-14-1    | 3.85     | 1729.140                          | 568.972                            | 3805.455                       | 95.899                |
| 50 | Isobutanoic acid                 | 79-31-2    | 4.88     | 1698.180                          | 620.268                            | 3814.507                       | 86.463                |
| 51 | Dichloroacetic acid              | 79-43-6    | 1.34     | 1783.480                          | 571.417                            | 3815.883                       | 127.043               |
| 52 | 2,6-Diisopropoxybenzoic acid     | 92035-95-5 | 3.60     | 1723.890                          | 756.310                            | 3805.215                       | 86.268                |
| 53 | 2,6-Dipropoxybenzoic acid        | 82560-07-4 | 3.55     | 1720.950                          | 806.837                            | 3806.423                       | 96.080                |
| 54 | 2,6-Diethoxybenzoic acid         | 82935-36-2 | 3.50     | 1739.210                          | 647.939                            | 3802.388                       | 91.667                |
| 55 | 3-Nitro-4-chlorobenzoic acid     | 96-99-1    | 3.29     | 1749.790                          | 549.630                            | 3821.319                       | 149.880               |
| 56 | 4- <i>tert</i> Butylbenzoic acid | 98-73-7    | 4.36     | 1727.500                          | 515.998                            | 3822.643                       | 129.293               |
| 57 | 3-Methylbenzoic acid             | 99-04-7    | 4.27     | 1727.510                          | 470.673                            | 3820.823                       | 122.338               |
| 58 | 3,5-Dinitrobenzoic acid          | 99-34-3    | 2.67     | 1761.910                          | 551.318                            | 3809.704                       | 156.852               |

| #  | Chemical                                  | CAS #      | Exp. pKa | $\nu_{COO^-}$ (cm <sup>-1</sup> ) | IR <sub>Int, COO<sup>-</sup></sub> | $\nu_{OH}$ (cm <sup>-1</sup> ) | IR <sub>Int, OH</sub> |
|----|-------------------------------------------|------------|----------|-----------------------------------|------------------------------------|--------------------------------|-----------------------|
| 59 | 4-Methylbenzoic acid                      | 99-94-5    | 4.35     | 1726.040                          | 517.723                            | 3821.769                       | 124.255               |
| 60 | 2-(Methylsulfonyl)benzoic acid            | 33963-55-2 | 2.53     | 1747.130                          | 601.045                            |                                |                       |
| 61 | 2-(Methoxycarbonyl)benzoic acid           | 4376-18-5  | 3.18     | 1732.670                          | 613.529                            |                                |                       |
| 62 | 3-Hydroxybenzoic acid                     | 99-06-9    | 4.09     | 1730.200                          | 455.846                            |                                |                       |
| 63 | 4-Hydroxybenzoic acid                     | 99-96-7    | 4.59     | 1726.410                          | 527.111                            |                                |                       |
| 64 | Fluoroacetic acid                         | 144-49-0   | 2.70     | 1740.495                          | 716.395                            |                                |                       |
| 65 | Difluoroacetic acid                       | 381-73-7   | 1.20     | 1767.563                          | 691.577                            |                                |                       |
| 66 | Trifluoroacetic acid                      | 76-05-1    | 0.30     | 1797.866                          | 724.337                            |                                |                       |
| 67 | Trifluoropropanoic acid                   | 2516-99-6  | 3.00     | 1749.642                          | 736.452                            |                                |                       |
| 68 | Trifluorobutanoic acid                    | 406-93-9   | 4.20     | 1716.672                          | 681.725                            |                                |                       |
| 69 | Chlorodifluoroacetic acid                 | 76-04-0    | 0.46     | 1812.904                          | 666.725                            |                                |                       |
| 70 | Tribromoacetic acid                       | 75-96-7    | -0.15    | 1845.749                          | 423.285                            |                                |                       |
| 71 | Trichloroacetic acid                      | 76-03-9    | 0.52     | 1834.880                          | 505.802                            |                                |                       |
| 72 | Nitroacetic acid                          | 625-75-2   | 1.68     | 1785.875                          | 659.415                            |                                |                       |
| 73 | 2-Propynoic acid                          | 471-25-0   | 1.89     | 1746.140                          | 732.528                            |                                |                       |
| 74 | Trichloroacrylic acid                     | 2257-35-4  | 1.15     | 1786.313                          | 586.936                            |                                |                       |
| 75 | Trifluoroacrylic acid                     | 433-68-1   | 1.79     | 1767.024                          | 654.667                            |                                |                       |
| 76 | 2,2-Dichloropropanoic acid                | 75-99-0    | 2.06     | 1784.726                          | 543.734                            |                                |                       |
| 77 | 2,3-Dichloropropanoic acid                | 565-64-0   | 2.85     | 1755.213                          | 637.526                            |                                |                       |
| 78 | Acetoacetic acid (18°C)                   | 541-50-4   | 3.58     | 1733.803                          | 717.853                            |                                |                       |
| 79 | 2-Propenoic acid                          | 79-10-7    | 4.26     | 1724.980                          | 302.868                            |                                |                       |
| 80 | Hexanoic acid                             | 142-62-1   | 4.80     | 1701.293                          | 677.185                            |                                |                       |
| 81 | Heptanoic acid                            | 111-14-8   | 4.89     | 1701.766                          | 678.849                            |                                |                       |
| 82 | Octanoic acid                             | 124-07-2   | 4.89     | 1701.616                          | 679.257                            |                                |                       |
| 83 | Formic acid                               | 64-18-6    | 3.75     | 1711.065                          | 887.385                            |                                |                       |
| 84 | Oxoacetic acid                            | 298-12-4   | 3.30     | 1758.054                          | 517.175                            |                                |                       |
| 85 | Nonanoic acid                             | 112-05-0   | 4.95     | 1704.944                          | 672.147                            |                                |                       |
| 86 | 4,4,5,5,6,6,6-Heptafluorohexanoic acid    | 356-02-5   | 4.18     | 1725.355                          | 667.823                            |                                |                       |
| 87 | 4,4,5,5,6,6,6-Heptafluoro-2-hexenoic acid | 356-03-6   | 3.23     | 1749.117                          | 247.818                            |                                |                       |
| 88 | Chloropropynoic acid                      | 6795-92-2  | 1.85     | 1759.419                          | 712.839                            |                                |                       |
| 89 | 2-Cyano-2-methylpropanoic acid            | 22426-30-8 | 2.42     | 1755.172                          | 577.561                            |                                |                       |

| #   | Chemical                           | CAS #      | Exp. pKa | $\nu_{COO^-}$ (cm <sup>-1</sup> ) | IR <sub>Int, COO<sup>-</sup></sub> | $\nu_{OH}$ (cm <sup>-1</sup> ) | IR <sub>Int, OH</sub> |
|-----|------------------------------------|------------|----------|-----------------------------------|------------------------------------|--------------------------------|-----------------------|
| 90  | Bromoacetic acid                   | 79-08-3    | 2.90     | 1755.679                          | 563.604                            |                                |                       |
| 91  | 2-Chlorobutanoic acid              | 4170-24-5  | 2.83     | 1749.363                          | 545.276                            |                                |                       |
| 92  | 3-Chlorobutanoic acid              | 1951-12-8  | 3.98     | 1728.453                          | 650.992                            |                                |                       |
| 93  | 4-Chlorobutanoic acid              | 627-00-9   | 4.52     | 1715.011                          | 662.694                            |                                |                       |
| 94  | 3-Butenoic acid                    | 625-38-7   | 4.35     | 1723.107                          | 651.853                            |                                |                       |
| 95  | 2,2-Dimethylpropanoic acid         | 75-98-9    | 5.03     | 1707.704                          | 583.468                            |                                |                       |
| 96  | 3-Methylbutanoic acid              | 503-74-2   | 4.77     | 1707.210                          | 655.495                            |                                |                       |
| 97  | 2-Methylbutanoic acid              | 116-53-0   | 4.80     | 1704.913                          | 594.637                            |                                |                       |
| 98  | 2-Butynoic acid                    | 590-93-2   | 2.62     | 1739.104                          | 721.221                            |                                |                       |
| 99  | 2-Chloropropanoic acid             | 598-78-7   | 2.83     | 1748.586                          | 550.720                            |                                |                       |
| 100 | 3-Bromopropanoic acid              | 590-92-1   | 4.00     | 1723.134                          | 698.802                            |                                |                       |
| 101 | 3-Chloropropionic acid             | 107-94-8   | 3.98     | 1719.481                          | 699.982                            |                                |                       |
| 102 | <i>trans</i> -Crotonic acid        | 107-93-7   | 4.69     | 1753.046                          | 89.929                             |                                |                       |
| 103 | Oxalic acid                        | 144-62-7   | 1.25     | 1791.131                          | 455.327                            |                                |                       |
| 104 | Nitroacetic acid                   | 625-75-2   | 1.48     | 1792.765                          | 652.040                            |                                |                       |
| 105 | Malonic acid                       | 141-82-2   | 2.87     | 1752.899                          | 688.948                            |                                |                       |
| 106 | Methoxyacetic acid                 | 625-45-6   | 3.57     | 1737.465                          | 674.446                            |                                |                       |
| 107 | 2-Hydroxypropanoic acid            | 79-33-4    | 3.83     | 1730.063                          | 513.749                            |                                |                       |
| 108 | 3-Hydroxypropanoic acid            | 503-66-2   | 4.49     | 1711.763                          | 563.296                            |                                |                       |
| 109 | Bromopropiolic acid                | 16900-53-1 | 1.86     | 1762.080                          | 706.187                            |                                |                       |
| 110 | <i>trans</i> -3-Chloroacrylic acid | 2345-61-1  | 3.79     | 1733.670                          | 593.196                            |                                |                       |
| 111 | <i>cis</i> -3-Chloroacrylic acid   | 1609-93-4  | 3.45     | 1736.145                          | 641.959                            |                                |                       |
| 112 | <i>cis</i> -3-bromoacrylic acid    | 1609-92-3  | 3.32     | 1739.600                          | 629.070                            |                                |                       |
| 113 | <i>trans</i> -3-bromoacrylic acid  | 6213-89-4  | 3.71     | 1735.813                          | 599.966                            |                                |                       |
| 114 | 2-bromopropanoic acid              | 598-72-1   | 3.01     | 1753.867                          | 513.501                            |                                |                       |
| 115 | Oxaloacetic acid                   | 328-42-7   | 2.22     | 1780.898                          | 470.621                            |                                |                       |
| 116 | Methylthioacetic acid              | 2444-37-3  | 3.66     | 1729.370                          | 613.226                            |                                |                       |
| 117 | 2-Mercaptopropanoic acid           | 79-42-5    | 3.65     | 1729.940                          | 560.032                            |                                |                       |
| 118 | 3-Mercaptopropanoic acid           | 107-96-0   | 4.38     | 1716.115                          | 674.655                            |                                |                       |
| 119 | 2,3-dimercaptopropanoic acid       | 6220-25-3  | 3.45     | 1731.643                          | 487.477                            |                                |                       |
| 120 | Trifluoromethylthioacetic acid     | 2408-17-5  | 2.95     | 1742.855                          | 629.925                            |                                |                       |

| #   | Chemical                       | CAS #       | Exp. pKa | $\nu_{COO^-}$ (cm <sup>-1</sup> ) | IR <sub>Int, COO<sup>-</sup></sub> | $\nu_{OH}$ (cm <sup>-1</sup> ) | IR <sub>Int, OH</sub> |
|-----|--------------------------------|-------------|----------|-----------------------------------|------------------------------------|--------------------------------|-----------------------|
| 121 | 3-Butynoic acid                | 2345-51-9   | 3.32     | 1750.665                          | 644.851                            |                                |                       |
| 122 | 2-Methyl-2-propenoic acid      | 79-41-4     | 4.65     | 1703.830                          | 493.825                            |                                |                       |
| 123 | Tartaric acid                  | 526-83-0    | 3.03     | 1763.088                          | 491.548                            |                                |                       |
| 124 | Ethoxyacetic acid              | 627-03-2    | 3.84     | 1733.715                          | 665.231                            |                                |                       |
| 125 | 3-Chloro-2-Butenoic acid       | 55831-56-6  | 4.10     | 1747.616                          | 334.901                            |                                |                       |
| 126 | 2-Chloro-3-butenoic acid       | 24253-33-6  | 2.55     | 1758.853                          | 596.694                            |                                |                       |
| 127 | 4-Sulfobutanoic acid           | 62605-67-8  | 4.91     | 1681.934                          | 652.773                            |                                |                       |
| 128 | 2-Furoic acid                  | 88-14-2     | 3.20     | 1747.162                          | 600.836                            |                                |                       |
| 129 | 2-Pentynoic acid               | 5963-77-9   | 2.61     | 1744.361                          | 701.637                            |                                |                       |
| 130 | 3-Pentynoic acid               | 36781-65-4  | 3.59     | 1739.857                          | 651.530                            |                                |                       |
| 131 | 4-Pentynoic acid               | 6089-09-4   | 4.20     | 1714.745                          | 668.745                            |                                |                       |
| 132 | <i>trans</i> -2-pentenoic acid | 13991-37-2  | 4.74     | 1699.769                          | 493.728                            |                                |                       |
| 133 | Glutaric acid                  | 110-94-1    | 4.35     | 1715.687                          | 654.432                            |                                |                       |
| 134 | 2-Thiophenecarboxylic acid     | 527-72-0    | 3.50     | 1736.430                          | 530.917                            |                                |                       |
| 135 | 4,4-Dinitropentanoic acid      | 5029-31-2   | 3.98     | 1729.220                          | 697.332                            |                                |                       |
| 136 | 4-Chloropentanoic acid         | 32607-54-8  | 4.40     | 1714.401                          | 653.831                            |                                |                       |
| 137 | 5-Sulfopentanoic acid          | 89211-38-1  | 5.04     | 1683.948                          | 667.169                            |                                |                       |
| 138 | 2,5-Furandicarboxylic acid     | 3238-40-2   | 2.60     | 1765.141                          | 456.593                            |                                |                       |
| 139 | 2-Hexen-4-ynoic acid           |             | 4.20     | 1727.700                          | 520.262                            |                                |                       |
| 140 | 4-Hexen-2-ynoic acid           | 129223-16-1 | 2.67     | 1750.981                          | 684.596                            |                                |                       |
| 141 | 5-Hexen-3-ynoic acid           |             | 3.39     | 1750.383                          | 626.125                            |                                |                       |
| 142 | 5-Hexynoic acid                | 53293-00-8  | 4.59     | 1710.695                          | 658.957                            |                                |                       |
| 143 | <i>trans</i> -2-hexenoic acid  | 13419-69-7  | 4.75     | 1703.657                          | 511.575                            |                                |                       |
| 144 | <i>cis</i> -2-hexenoic acid    | 1577-28-2   | 4.63     | 1691.416                          | 518.553                            |                                |                       |
| 145 | 5-oxohexanoic acid             | 3128-06-1   | 4.80     | 1709.688                          | 709.158                            |                                |                       |
| 146 | 2,2-dimethylbutanoic acid      | 595-37-9    | 4.93     | 1708.425                          | 549.167                            |                                |                       |
| 147 | 2-Methylpentanoic acid         | 97-61-0     | 4.78     | 1705.227                          | 607.889                            |                                |                       |
| 148 | 3-methylpentanoic acid         | 105-43-1    | 4.77     | 1706.375                          | 661.032                            |                                |                       |
| 149 | 2-Cyano-3-methylbutanoic acid  | 22426-27-3  | 2.40     | 1759.268                          | 589.135                            |                                |                       |
| 150 | 5-Chlorohexanoic acid          | 112176-22-4 | 4.60     | 1714.228                          | 668.984                            |                                |                       |
| 151 | 2-Heptynoic acid               | 1483-67-6   | 2.60     | 1744.669                          | 697.465                            |                                |                       |

| #   | Chemical                               | CAS #      | Exp. pKa | $\nu_{COO^-}$ (cm <sup>-1</sup> ) | IR <sub>Int, COO<sup>-</sup></sub> | $\nu_{OH}$ (cm <sup>-1</sup> ) | IR <sub>Int, OH</sub> |
|-----|----------------------------------------|------------|----------|-----------------------------------|------------------------------------|--------------------------------|-----------------------|
| 152 | 6-Heptynoic acid                       | 30964-00-2 | 4.57     | 1709.924                          | 667.616                            |                                |                       |
| 153 | <i>trans</i> -2-heptenoic acid         | 18999-28-5 | 4.88     | 1704.368                          | 491.707                            |                                |                       |
| 154 | <i>cis</i> -2-methyl-2-hexenoic acid   |            | 4.44     | 1700.290                          | 634.148                            |                                |                       |
| 155 | <i>trans</i> -2-methyl-2-hexenoic acid | 28897-58-7 | 5.13     | 1706.415                          | 543.982                            |                                |                       |
| 156 | Heptanedioic acid                      | 111-16-0   | 4.50     | 1707.787                          | 668.014                            |                                |                       |
| 157 | 3,3-dimethylpentanedioic acid          | 4839-46-7  | 3.73     | 1707.905                          | 620.097                            |                                |                       |
| 158 | 2,2-dimethylpentanoic acid             | 1185-39-3  | 4.97     | 1706.820                          | 544.086                            |                                |                       |
| 159 | 4,4-dinitroheptanedioic acid           | 5029-40-3  | 3.52     | 1734.428                          | 529.004                            |                                |                       |
| 160 | Phenylacetic acid                      | 103-82-2   | 4.30     | 1734.241                          | 632.535                            |                                |                       |
| 161 | Phenoxyacetic acid                     | 122-59-8   | 3.16     | 1750.823                          | 647.301                            |                                |                       |
| 162 | Octanedioic acid                       | 505-48-6   | 4.52     | 1706.316                          | 669.994                            |                                |                       |
| 163 | 3-propylpentanedioic acid              | 4165-98-4  | 4.32     | 1709.515                          | 701.716                            |                                |                       |
| 164 | 2,4-Dichlorophenoxyacetic acid         | 94-75-7    | 2.90     | 1763.669                          | 643.113                            |                                |                       |
| 165 | 2,6-Dichlorophenoxyacetic acid         | 575-90-6   | 3.30     | 1759.749                          | 640.642                            |                                |                       |
| 166 | 4-nitrophenoxyacetic acid              | 1798-11-4  | 2.81     | 1763.285                          | 645.227                            |                                |                       |
| 167 | Phenylsulfonylacetic acid              | 3959-23-7  | 2.51     | 1779.272                          | 601.620                            |                                |                       |
| 168 | 3-Phenylpropynoic acid                 | 637-44-5   | 2.23     | 1760.779                          | 656.143                            |                                |                       |
| 169 | 2,4-Nonadiynoic acid                   | 80220-96-8 | 1.89     | 1763.555                          | 672.215                            |                                |                       |



**Table S2.** Individual QSARs developed for  $\nu_{OH}$  and  $\nu_{COO^-}$

| QSAR                   | <i>a</i>                          | <i>c</i>                       |
|------------------------|-----------------------------------|--------------------------------|
| $pKa = av_{OH} + c$    | $(7.47 \pm 1.10) \times 10^{-2}$  | $(-2.81 \pm 0.41) \times 10^2$ |
| $pKa = av_{COO^-} + c$ | $(-4.25 \pm 0.25) \times 10^{-2}$ | $(7.74 \pm 0.44) \times 10^1$  |

**Table S3.** QSARs developed with  $\nu_{OH}$  and  $\nu_{COO^-}$  and their corresponding  $IR_{Int}$

| QSAR                               | <i>a</i>                          | <i>b</i>                          | <i>c</i>                       |
|------------------------------------|-----------------------------------|-----------------------------------|--------------------------------|
| $pKa = av_{OH} + bIR_{Int} + c$    | $(9.72 \pm 0.82) \times 10^{-2}$  | $(-2.77 \pm 0.36) \times 10^{-2}$ | $(-3.64 \pm 0.31) \times 10^2$ |
| $pKa = av_{COO^-} + bIR_{Int} + c$ | $(-4.58 \pm 0.18) \times 10^{-2}$ | $(-3.34 \pm 0.43) \times 10^{-3}$ | $(8.50 \pm 0.32) \times 10^1$  |

**Table S4.** Symmetric ( $\nu_{\text{COO}^-, \text{sym}}$ ) and antisymmetric ( $\nu_{\text{COO}^-}$ )  $\text{COO}^-$  stretching vibrational frequencies and corresponding infrared intensities calculated using different functionals and basis sets for the first 59 carboxylic acids listed in Table S1.

| #  | <i>M06-2X/ aug-cc-pVDZ</i>                            |                                            | <i>M06-2X/6-311++G(2d,2p)</i>             |                                 | <i>B3LYP/Def2TZVP</i>                     |                                 | <i><math>\omega</math>B97X-D/cc-pVTZ</i>  |                                 |
|----|-------------------------------------------------------|--------------------------------------------|-------------------------------------------|---------------------------------|-------------------------------------------|---------------------------------|-------------------------------------------|---------------------------------|
|    | $\nu_{\text{COO}^-, \text{sym}}$ ( $\text{cm}^{-1}$ ) | $\text{IR}_{\text{Int, COO}^- \text{sym}}$ | $\nu_{\text{COO}^-}$ ( $\text{cm}^{-1}$ ) | $\text{IR}_{\text{Int, COO}^-}$ | $\nu_{\text{COO}^-}$ ( $\text{cm}^{-1}$ ) | $\text{IR}_{\text{Int, COO}^-}$ | $\nu_{\text{COO}^-}$ ( $\text{cm}^{-1}$ ) | $\text{IR}_{\text{Int, COO}^-}$ |
| 1  | 1390.104                                              | 400.286                                    | 1726.794                                  | 549.625                         | 1683.187                                  | 416.262                         | 1752.585                                  | 437.960                         |
| 2  | 1400.906                                              | 311.025                                    | 1700.538                                  | 682.634                         | 1671.421                                  | 520.312                         | 1737.220                                  | 527.284                         |
| 3  | 1387.364                                              | 427.904                                    | –                                         | –                               | 1685.879                                  | 404.586                         | 1755.331                                  | 423.989                         |
| 4  | –                                                     | –                                          | 1702.254                                  | 681.959                         | 1672.167                                  | 518.600                         | 1737.922                                  | 528.852                         |
| 5  | 1380.306                                              | 225.070                                    | 1725.755                                  | 507.475                         | 1678.427                                  | 358.089                         | 1752.100                                  | 362.414                         |
| 6  | 1381.362                                              | 380.406                                    | 1747.072                                  | 545.552                         | 1699.492                                  | 402.036                         | 1768.508                                  | 425.214                         |
| 7  | 1382.275                                              | 378.576                                    | 1740.700                                  | 514.788                         | 1694.343                                  | 390.434                         | 1765.829                                  | 412.455                         |
| 8  | 1390.386                                              | 424.258                                    | 1723.548                                  | 534.557                         | 1680.647                                  | 408.551                         | 1749.020                                  | 433.008                         |
| 9  | 1384.853                                              | 336.233                                    | 1733.178                                  | 538.376                         | 1687.917                                  | 407.630                         | 1760.352                                  | 433.333                         |
| 10 | 1382.695                                              | 377.772                                    | 1742.416                                  | 518.891                         | 1699.241                                  | 395.324                         | 1768.152                                  | 415.958                         |
| 11 | 1389.743                                              | 273.884                                    | 1729.962                                  | 618.032                         | 1683.106                                  | 505.849                         | 1750.683                                  | 524.405                         |
| 12 | 1384.671                                              | 404.114                                    | 1740.856                                  | 528.136                         | 1692.190                                  | 395.175                         | 1761.956                                  | 415.118                         |
| 13 | 1354.800                                              | 375.713                                    | 1766.761                                  | 679.697                         | 1743.225                                  | 534.372                         | 1803.630                                  | 538.553                         |
| 14 | 1383.535                                              | 391.753                                    | 1735.079                                  | 488.936                         | 1692.291                                  | 372.749                         | 1761.121                                  | 395.283                         |
| 15 | 1379.122                                              | 317.468                                    | 1748.660                                  | 524.262                         | 1701.592                                  | 400.327                         | 1774.696                                  | 424.536                         |
| 16 | 1374.405                                              | 445.256                                    | 1767.013                                  | 691.621                         | 1723.768                                  | 521.021                         | 1795.639                                  | 536.184                         |
| 17 | 1381.910                                              | 380.816                                    | 1742.049                                  | 515.167                         | 1694.689                                  | 389.264                         | 1765.944                                  | 411.090                         |
| 18 | 1389.360                                              | 221.555                                    | 1739.169                                  | 533.205                         | 1695.815                                  | 404.633                         | 1764.383                                  | 426.132                         |
| 19 | 1384.149                                              | 380.380                                    | 1731.132                                  | 483.868                         | 1690.804                                  | 370.011                         | 1759.828                                  | 395.391                         |
| 20 | 1388.179                                              | 373.860                                    | 1730.559                                  | 538.267                         | 1687.804                                  | 414.733                         | 1754.964                                  | 438.111                         |
| 21 | 1383.909                                              | 411.975                                    | 1734.527                                  | 491.209                         | 1690.650                                  | 364.475                         | 1759.827                                  | 393.561                         |
| 22 | 1397.556                                              | 211.700                                    | 1726.427                                  | 437.760                         | 1683.082                                  | 331.638                         | 1751.932                                  | 376.207                         |
| 23 | 1374.234                                              | 321.208                                    | 1763.190                                  | 592.840                         | 1720.705                                  | 449.851                         | 1795.020                                  | 468.533                         |
| 24 | 1379.517                                              | 428.350                                    | 1746.703                                  | 505.309                         | 1696.759                                  | 380.488                         | 1765.785                                  | 400.848                         |
| 25 | 1381.503                                              | 377.048                                    | 1743.165                                  | 518.955                         | 1698.276                                  | 390.292                         | 1768.852                                  | 409.477                         |
| 26 | 1381.243                                              | 408.037                                    | 1735.512                                  | 488.371                         | 1693.537                                  | 369.773                         | 1762.013                                  | 394.669                         |
| 27 | 1372.498                                              | 335.938                                    | 1761.192                                  | 548.767                         | 1709.232                                  | 452.331                         | 1780.917                                  | 457.090                         |
| 28 | 1386.660                                              | 498.172                                    | 1731.879                                  | 534.413                         | 1686.837                                  | 409.542                         | 1756.330                                  | 420.099                         |

| #  | <i>M06-2X/ aug-cc-pVDZ</i>                     |                                     | <i>M06-2X/6-311++G(2d,2p)</i>            |                                 | <i>B3LYP/Def2TZVP</i>                    |                                 | <i>ωB97X-D/cc-pVTZ</i>                   |                                 |
|----|------------------------------------------------|-------------------------------------|------------------------------------------|---------------------------------|------------------------------------------|---------------------------------|------------------------------------------|---------------------------------|
|    | $\nu_{\text{COO}^-}$ , sym (cm <sup>-1</sup> ) | $\text{IR}_{\text{int, COO}^-}$ sym | $\nu_{\text{COO}^-}$ (cm <sup>-1</sup> ) | $\text{IR}_{\text{int, COO}^-}$ | $\nu_{\text{COO}^-}$ (cm <sup>-1</sup> ) | $\text{IR}_{\text{int, COO}^-}$ | $\nu_{\text{COO}^-}$ (cm <sup>-1</sup> ) | $\text{IR}_{\text{int, COO}^-}$ |
| 29 | 1392.388                                       | 300.448                             | 1725.713                                 | 604.216                         | 1677.225                                 | 562.397                         | 1745.062                                 | 598.914                         |
| 30 | 1379.296                                       | 425.063                             | 1736.595                                 | 482.099                         | 1695.088                                 | 361.159                         | 1764.112                                 | 387.467                         |
| 31 | 1386.346                                       | 414.806                             | 1727.896                                 | 464.095                         | 1686.499                                 | 352.922                         | 1756.555                                 | 384.669                         |
| 32 | 1383.975                                       | 373.168                             | 1740.877                                 | 506.490                         | 1695.514                                 | 380.881                         | 1763.675                                 | 378.306                         |
| 33 | 1385.761                                       | 401.446                             | 1733.335                                 | 529.412                         | 1689.567                                 | 404.600                         | 1758.885                                 | 424.026                         |
| 34 | 1384.654                                       | 321.429                             | 1732.286                                 | 540.715                         | 1687.752                                 | 419.741                         | 1759.405                                 | 447.429                         |
| 35 | 1383.398                                       | 353.600                             | 1734.289                                 | 445.622                         | 1691.734                                 | 311.002                         | –                                        | –                               |
| 36 | 1370.446                                       | 218.121                             | 1766.102                                 | 558.652                         | 1726.694                                 | 434.430                         | 1794.669                                 | 455.667                         |
| 37 | 1370.903                                       | 287.080                             | 1762.515                                 | 544.098                         | 1724.399                                 | 416.871                         | 1794.974                                 | 440.066                         |
| 38 | 1346.885                                       | 284.190                             | 1792.383                                 | 543.553                         | 1740.250                                 | 394.756                         | 1813.973                                 | 435.317                         |
| 39 | 1387.260                                       | 302.627                             | 1730.771                                 | 506.043                         | 1682.408                                 | 378.082                         | 1750.661                                 | 404.771                         |
| 40 | 1381.567                                       | 401.371                             | 1739.273                                 | 526.083                         | 1694.034                                 | 396.172                         | 1765.380                                 | 417.428                         |
| 41 | 1381.698                                       | 402.789                             | 1733.915                                 | 530.906                         | 1688.767                                 | 401.336                         | 1761.852                                 | 424.959                         |
| 42 | 1379.550                                       | 486.933                             | 1740.957                                 | 463.651                         | 1690.356                                 | 365.526                         | 1765.741                                 | 400.184                         |
| 43 | 1380.867                                       | 379.104                             | 1742.290                                 | 517.448                         | 1698.008                                 | 389.046                         | 1768.858                                 | 409.931                         |
| 44 | 1398.880                                       | 323.405                             | 1697.195                                 | 716.079                         | 1674.439                                 | 530.819                         | 1739.797                                 | 527.425                         |
| 45 | 1389.782                                       | 369.448                             | 1727.142                                 | 518.093                         | 1685.257                                 | 391.857                         | 1753.038                                 | 417.402                         |
| 46 | 1386.236                                       | 394.416                             | 1732.329                                 | 532.171                         | 1689.897                                 | 407.513                         | 1758.064                                 | 426.376                         |
| 47 | –                                              | –                                   | 1699.644                                 | 677.143                         | 1671.257                                 | 521.086                         | 1737.021                                 | 522.783                         |
| 48 | 1383.253                                       | 270.097                             | 1755.586                                 | 600.378                         | 1722.406                                 | 453.167                         | 1789.626                                 | 460.727                         |
| 49 | 1411.063                                       | 267.031                             | 1727.692                                 | 576.760                         | 1698.838                                 | 421.370                         | 1761.903                                 | 440.243                         |
| 50 | 1413.046                                       | 212.052                             | 1698.216                                 | 627.356                         | 1669.660                                 | 476.296                         | 1733.708                                 | 478.895                         |
| 51 | 1364.857                                       | 279.883                             | 1789.490                                 | 578.966                         | 1746.575                                 | 446.956                         | 1815.130                                 | 461.805                         |
| 52 | 1403.596                                       | 238.034                             | 1718.654                                 | 742.438                         | 1672.570                                 | 538.408                         | 1746.743                                 | 568.969                         |
| 53 | 1404.439                                       | 344.910                             | 1706.946                                 | 437.670                         | 1675.957                                 | 586.302                         | –                                        | –                               |
| 54 | 1389.046                                       | 375.979                             | 1734.886                                 | 652.582                         | 1701.309                                 | 487.511                         | 1773.118                                 | 498.623                         |
| 55 | 1378.283                                       | 392.854                             | 1752.252                                 | 555.002                         | 1703.534                                 | 409.530                         | 1774.616                                 | 430.423                         |
| 56 | 1389.692                                       | 435.973                             | 1726.455                                 | 526.003                         | 1684.129                                 | 398.577                         | 1752.763                                 | 418.182                         |
| 57 | 1391.101                                       | 297.726                             | 1726.138                                 | 477.441                         | 1684.979                                 | 361.222                         | 1753.055                                 | 395.829                         |
| 58 | 1371.909                                       | 390.711                             | –                                        | –                               | 1712.018                                 | 398.070                         | 1782.940                                 | 425.367                         |
| 59 | 1389.894                                       | 391.544                             | 1725.370                                 | 525.791                         | 1683.040                                 | 398.721                         | 1751.328                                 | 420.821                         |

**Table S5.** QSARs developed with  $\nu_{COO^-}$  and their corresponding  $IR_{int}$  using different functionals and basis sets.

| Functional/Basis Set                     | $pKa = a\nu_{COO^-} + bIR_{int} + c$ |                                   |                               |
|------------------------------------------|--------------------------------------|-----------------------------------|-------------------------------|
|                                          | $a$                                  | $b$                               | $c$                           |
| <i>M06-2X/6-311++G(2d,2p)</i>            | $(-4.14 \pm 0.25) \times 10^{-2}$    | $(-2.37 \pm 0.70) \times 10^{-3}$ | $(7.69 \pm 0.44) \times 10^1$ |
| <i>B3LYP/Def2TZVP</i>                    | $(-4.51 \pm 0.28) \times 10^{-2}$    | $(-1.80 \pm 0.82) \times 10^{-3}$ | $(8.09 \pm 0.48) \times 10^1$ |
| <i><math>\omega</math>B97X-D/cc-pVTZ</i> | $(-4.62 \pm 0.21) \times 10^{-2}$    | $(-2.35 \pm 0.75) \times 10^{-3}$ | $(8.61 \pm 0.38) \times 10^1$ |

**Table S6.** Experimental pKa of perfluoroalkyl carboxylic acids.

| <b>pKa</b> | <b>SD<sup>a</sup></b> | <b>PFAS<sup>b</sup></b> | <b>Reference</b>                               |
|------------|-----------------------|-------------------------|------------------------------------------------|
| 0.54       | 0.06                  | TFA                     | Moroi et al., 2000 - Titration <sup>6</sup>    |
| 0.62       |                       | TFA                     | Moroi et al., 2000 - Conductivity <sup>6</sup> |
| 0.25       | 0.03                  | TFA                     | Henne et al., 1951 <sup>7</sup>                |
| 0.44       | 0.03                  | PFPrA                   | Moroi et al., 2000 - Titration <sup>6</sup>    |
| 0.54       |                       | PFPrA                   | Moroi et al., 2000 - Conductivity <sup>6</sup> |
| -0.42      |                       | PFPrA                   | Hershfield et al., 1973 <sup>8</sup>           |
| 0.38       | 0.09                  | PFBA                    | Moroi et al., 2000 - Titration <sup>6</sup>    |
| 0.42       |                       | PFBA                    | Moroi et al., 2000 - Conductivity <sup>6</sup> |
| 0.19       | 0.03                  | PFBA                    | Henne et al., 1951 <sup>7</sup>                |
| < 1.60     |                       | PFBA                    | Vierke et al., 2013 <sup>9</sup>               |
| 0.64       |                       | PFPeA                   | Moroi et al., 2000 - Titration <sup>6</sup>    |
| 0.43       |                       | PFPeA                   | Moroi et al., 2000 - Conductivity <sup>6</sup> |
| 0.89       | 0.05                  | PFHxA                   | Moroi et al., 2000 - Titration <sup>6</sup>    |
| 0.75       |                       | PFHxA                   | Moroi et al., 2000 - Conductivity <sup>6</sup> |
| < 1.60     |                       | PFHxA                   | Vierke et al., 2013 <sup>9</sup>               |
| < 1.60     |                       | PFHpA                   | Vierke et al., 2013 <sup>9</sup>               |
| 3.80       | 0.10                  | PFOA                    | Burns et al., 2008 <sup>10</sup>               |
| 2.80       | 0.03                  | PFOA                    | Brace, 1962 <sup>11</sup>                      |
| 0.50       |                       | PFOA                    | Vierke et al., 2013 <sup>9</sup>               |
| 1.31       | 0.07                  | PFOA                    | Lopez-Fontan et al., 2005 <sup>12</sup>        |
| 1.01       |                       | PFOA                    | Igarashi et al., 1992 <sup>13</sup>            |
| < 0.42     |                       | PFOA                    | Feehan et al., 2019 <sup>14</sup>              |
| < 1.00     |                       | PFOA                    | Cheng et al., 2009 <sup>15</sup>               |
| < 1.60     |                       | PFNA                    | Vierke et al., 2013 <sup>9</sup>               |
| 2.58       |                       | PFDA                    | Moroi et al., 2000 - Solubility <sup>6</sup>   |
| < 1.60     |                       | PFDA                    | Vierke et al., 2013 <sup>9</sup>               |

<sup>a</sup> Standard deviation (SD) calculated with *n* values as reported in the corresponding source. <sup>b</sup> Name of the perfluorinated compound.

**Table S7.** pKa, COO<sup>-</sup> antisymmetric stretching vibrational frequencies of the carboxylate anions ( $\nu_{COO^-}$ ), and corresponding infrared intensities (IR<sub>int</sub>) of selected betaines.

| # | Chemical                         | CAS #      | Exp. pKa | $\nu_{COO^-}$ (cm <sup>-1</sup> ) | IR <sub>int</sub> | Est. pKa <sup>a</sup> | Source |
|---|----------------------------------|------------|----------|-----------------------------------|-------------------|-----------------------|--------|
| 1 | 1-1Betaine (1-1)                 | 6915-17-9  | 2.03     | 1802.119                          | 624.781           | 0.61                  | 16     |
| 2 | 5-1Betaine                       | 68409-45-0 | 4.25     | 1737.031                          | 675.441           | 3.20                  | 16     |
| 3 | 10-1Betaine                      |            | 4.61     | 1716.916                          | 677.872           | 4.05                  | 16     |
| 4 | 1-12Betaine                      | 66455-29-6 | 1.80     | 1795.901                          | 699.228           | 0.65                  | 16     |
| 5 | 2-12Betaine                      |            | 3.25     | 1739.601                          | 557.664           | 3.44                  | 16     |
| 6 | 3-12Betaine                      |            | 3.96     | 1738.824                          | 774.940           | 2.84                  | 16     |
| 7 | 1-Methyl-3-aceticacidimidazole   |            | 2.00     | 1802.882                          | 693.027           | 0.37                  | 17     |
| 8 | 1-Methyl-3-butanoicacidimidazole |            | 3.83     | 1743.256                          | 879.335           | 2.34                  | 17     |
| 9 | 1,3-diaceticacidimidazole        |            | 1.33     | 1799.756                          | 696.799           | 0.49                  | 17     |

<sup>a</sup> Estimated with the “All” QSAR developed for CAs (Table 1).

**Table S8.** pKa and SO<sub>3</sub><sup>-</sup> antisymmetric stretching vibrational frequencies ( $\nu_{SO_3^-}$ ) of selected sulfonic acids.

| #  | Chemical                             | CAS #     | Exp. pKa | $\nu_{SO_3^-}$ (cm <sup>-1</sup> ) | Source |
|----|--------------------------------------|-----------|----------|------------------------------------|--------|
| 1  | 1-Aminoethanesulfonic acid           | 1636-31-3 | -0.33    | 1168.235                           | 2      |
| 2  | Methanesulfonic acid                 | 75-75-2   | -1.92    | 1181.601                           | 18     |
| 3  | Ethanesulfonic acid                  | 594-45-6  | -1.68    | 1169.817                           | 18     |
| 4  | Propanesulfonic acid                 | 5284-66-2 | -1.53    | 1172.773                           | 18     |
| 5  | Benzenesulfonic acid                 | 98-11-3   | -2.80    | 1203.927                           | 19     |
| 6  | 4-Bromobenzenesulfonic acid          | 138-36-3  | -3.10    | 1208.881                           | 19     |
| 7  | 4-Nitrobenzenesulfonic acid          | 138-42-1  | -4.00    | 1216.146                           | 19     |
| 8  | Methoxysulfonic acid                 | 75-93-4   | -3.40    | 1205.629                           | 19     |
| 9  | Chlorosulfonic acid                  | 7790-94-5 | -6.00    | 1269.302                           | 19     |
| 10 | Fluorosulfonic acid                  | 7789-21-1 | -6.40    | 1264.687                           | 19     |
| 11 | Trifluoromethanesulfonic acid (PFMS) | 1493-13-6 | -5.90    | 1250.669                           | 19     |
| 12 | 4-Hydroxybenzenesulfonic acid        | 98-67-9   | -2.19    | 1190.983                           | 20     |
| 13 | 1,2-Ethanedisulfonic acid            | 110-04-3  | -2.06    | 1183.473                           | 21     |
| 14 | 2-Naphthalenesulfonic acid           | 120-18-3  | -2.00    | 1193.097                           | 22     |

**Table S9.** pKa,  $\text{HPO}_3^-$  antisymmetric stretching vibrational frequencies ( $\nu_{\text{HPO}_3^-}$ ), and corresponding infrared intensities ( $\text{IR}_{\text{int}}$ ) of selected phosphonic acids. Experimental pKa taken from refs.<sup>23,24</sup>

| #  | Chemical                                | CAS #       | Exp. pKa | $\nu_{\text{HPO}_3^-}$ ( $\text{cm}^{-1}$ ) | $\text{IR}_{\text{int}}$ |
|----|-----------------------------------------|-------------|----------|---------------------------------------------|--------------------------|
| 1  | Methylphosphonic acid                   | 993-13-5    | 2.38     | 1259.911                                    | 346.244                  |
| 2  | Ethylphosphonic acid                    | 6779-09-5   | 2.43     | 1265.300                                    | 250.245                  |
| 3  | Propylphosphonic acid                   | 4672-38-2   | 2.49     | 1254.214                                    | 274.565                  |
| 4  | Isopropylphosphonic acid                | 4721-37-3   | 2.66     | 1244.634                                    | 173.165                  |
| 5  | Butylphosphonic acid                    | 3321-64-0   | 2.59     | 1257.099                                    | 285.363                  |
| 6  | 2-Butylphosphonic acid                  | 6778-87-6   | 2.74     | 1252.448                                    | 204.311                  |
| 7  | 2-Methylpropylphosphonic acid           | 4721-34-0   | 2.70     | 1258.839                                    | 289.701                  |
| 8  | <i>tert</i> -butylphosphonic acid       | 4923-84-6   | 2.79     | 1256.695                                    | 280.344                  |
| 9  | <i>tert</i> -pentylphosphonic acid      |             | 2.84     | 1254.027                                    | 158.348                  |
| 10 | <i>neo</i> -pentylphosphonic acid       |             | 2.88     | 1252.783                                    | 285.286                  |
| 11 | Trifluoromethylphosphonic acid (PFMP)   | 374-09-4    | 1.16     | 1314.145                                    | 355.786                  |
| 12 | Chloromethylphosphonic acid             | 2565-58-4   | 1.40     | 1289.460                                    | 307.029                  |
| 13 | Dichloromethylphosphonic acid           | 13113-88-7  | 1.14     | 1301.224                                    | 271.063                  |
| 14 | Trichloromethylphosphonic acid          | 5994-41-2   | 0.78     | 1316.437                                    | 242.286                  |
| 15 | Bromomethylphosphonic acid              | 7582-40-3   | 1.15     | 1292.066                                    | 298.898                  |
| 16 | 2-Bromoethylphosphonic acid             | 999-82-6    | 1.62     | 1277.544                                    | 261.942                  |
| 17 | Hydroxymethylphosphonic acid            | 2617-47-2   | 1.91     | 1274.333                                    | 300.096                  |
| 18 | 3-Chloro-4-methoxyphenylphosphonic acid |             | 2.25     | 1278.672                                    | 223.349                  |
| 19 | 2-Chloro-4-nitrophenylphosphonic acid   | 114792-24-4 | 1.12     | 1292.216                                    | 263.788                  |
| 20 | 2-Fluorophenylphosphonic acid           |             | 1.64     | 1285.402                                    | 299.877                  |
| 21 | Hexylphosphonic acid                    | 4721-24-8   | 2.60     | 1257.069                                    | 203.635                  |
| 22 | Phenylphosphonic acid                   | 1571-33-1   | 1.83     | 1272.743                                    | 259.552                  |
| 23 | 4-Methylphenylphosphonic acid           | 3366-72-1   | 1.84     | 1270.894                                    | 249.490                  |

**Table S10.** pKa, SO<sub>2</sub><sup>-</sup> stretching vibrational frequencies ( $\nu_{\text{SO}_2^-}$ ), and corresponding infrared intensities (IR<sub>Int</sub>) of selected sulfonamides.

| #  | Chemical                                                    | CAS #      | Exp. pKa | $\nu_{\text{SO}_2^-}$ (cm <sup>-1</sup> ) | IR <sub>Int</sub> , | Source |
|----|-------------------------------------------------------------|------------|----------|-------------------------------------------|---------------------|--------|
| 1  | Trifluoromethanesulfonamide (PFMSA)                         | 421-85-2   | 6.33     | 1257.478                                  | 327.454             | 25     |
| 2  | 1,1,1-Trifluoro-N-phenylmethanesulfonamide                  | 456-64-4   | 4.45     | 1254.350                                  | 364.183             | 25     |
| 3  | 4-Fluorobenzenesulfonamide                                  | 402-46-0   | 10.02    | 1226.372                                  | 176.554             | 26     |
| 4  | 3-Trifluoromethylbenzenesulfonamide                         | 672-58-2   | 9.69     | 1230.237                                  | 194.076             | 26     |
| 5  | 4-Trifluoromethylbenzenesulfonamide                         | 830-43-3   | 9.64     | 1232.273                                  | 172.371             | 26     |
| 6  | 2,3,4,5,6-Pentafluorobenzenesulfonamide                     | 778-36-9   | 8.30     | 1269.719                                  | 142.198             | 26     |
| 7  | 4-Aminobenzenesulfonamide                                   | 63-74-1    | 10.22    | 1223.224                                  | 162.755             | 27     |
| 8  | Methanesulfonamide                                          | 3144-09-0  | 10.80    | 1221.006                                  | 196.636             | 25     |
| 9  | N-phenylmethanesulfonamide                                  | 1197-22-4  | 8.85     | 1215.339                                  | 249.499             | 25     |
| 10 | N-4-Chlorophenyl-1,1,1-trifluoromethanesulfonamide          | 23384-04-5 | 3.90     | 1270.475                                  | 367.961             | 25     |
| 11 | N-3-methylphenyl-1,1,1-trifluoromethanesulfonamide          |            | 3.75     | 1269.316                                  | 326.808             | 25     |
| 12 | 1,1,1-Trifluoro-N-3-trifluoromethylphenylmethanesulfonamide | 23384-11-4 | 3.50     | 1267.736                                  | 339.758             | 25     |
| 13 | N-4-[Methylsulfonylphenyl]trifluoromethanesulfonamide       |            | 2.84     | 1276.533                                  | 383.118             | 25     |
| 14 | Difluoromethanesulfonamide                                  | 50585-74-5 | 8.06     | 1246.962                                  | 248.053             | 25     |
| 15 | Fluoromethanesulfonamide                                    | 50585-72-3 | 9.32     | 1250.945                                  | 165.537             | 25     |
| 16 | Fluoromethanesulfonanilide                                  | 2070-61-3  | 7.57     | 1253.383                                  | 147.387             | 25     |
| 17 | Difluoromethanesulfonanilide                                | 658-43-5   | 6.19     | 1260.756                                  | 317.998             | 25     |
| 18 | N-Benzyltriflamide                                          | 36457-58-6 | 6.82     | 1264.859                                  | 218.913             | 25     |



**Table S11.** pKa, OH stretching vibrational frequencies ( $\nu_{FTOH}$ ), CO<sup>-</sup> stretching vibrational frequencies ( $\nu_{CO^-}$ ), and corresponding infrared intensities (IR<sub>Int</sub>) of selected alcohols.

| #  | Chemical                                         | CAS #     | Exp. pKa                            | $\nu_{CO^-}$ (cm <sup>-1</sup> ) | IR <sub>Int, CO-</sub> | $\nu_{FTOH}$ (cm <sup>-1</sup> ) | IR <sub>Int, OH</sub> | Source |
|----|--------------------------------------------------|-----------|-------------------------------------|----------------------------------|------------------------|----------------------------------|-----------------------|--------|
| 1  | Methanol                                         | 67-56-1   | 15.54                               | 1180.297                         | 399.641                | 3900.051                         | 42.539                | 28     |
| 2  | Ethanol                                          | 64-17-5   | 15.50                               | 1220.375                         | 268.189                | 3880.029                         | 32.165                | 28     |
| 3  | 1-Propanol                                       | 71-23-8   | 16.10                               | 1218.517                         | 329.893                | 3886.329                         | 32.988                | 28     |
| 4  | Isopropanol                                      | 67-63-0   | 16.50                               | 1229.196                         | 172.417                | 3861.374                         | 24.439                | 29     |
| 5  | <i>tert</i> -butanol                             | 75-65-0   | 16.00                               | 1251.417                         | 200.576                | 3870.975                         | 23.005                | 28     |
| 6  | 2-Buten-1-ol                                     | 4088-60-2 | 15.52                               | 1185.866                         | 257.214                | 3885.237                         | 32.981                | 28     |
| 7  | 1,3-Propanediol                                  | 504-63-2  | 15.10                               | 1224.836                         | 271.550                | 3880.724                         | 34.855                | 28     |
| 8  | 1,4-Butanediol                                   | 110-63-4  | 15.10                               | 1233.507                         | 316.422                | 3890.623                         | 34.120                | 28     |
| 9  | 1,3-Butanediol                                   | 107-88-0  | 14.90                               | 1238.069                         | 68.936                 | 3883.840                         | 35.163                | 28     |
| 10 | 2-Methoxyethanol                                 | 109-86-4  | 14.80                               | 1212.711                         | 240.375                | 3891.958                         | 37.958                | 28     |
| 11 | 2-Propynol                                       | 107-19-7  | 13.55                               | 1200.278                         | 305.768                | 3882.202                         | 47.151                | 28     |
| 12 | Trifluoroethanol (1:1FTOH)                       | 75-89-8   | 11.40;<br>12.37;<br>12.50;<br>12.80 | 1250.246                         | 306.619                | 3863.723                         | 62.859                | 29     |
| 13 | Trichloroethanol                                 | 115-20-8  | 12.02                               | 1296.482                         | 249.362                | 3860.144                         | 50.410                | 28     |
| 14 | 2-Trifluoromethyl-2-propanol                     | 507-52-8  | 11.60                               | 1279.509                         | 233.081                | 3898.058                         | 44.813                | 28     |
| 15 | Benzylalcohol                                    | 100-51-6  | 15.40                               | 1183.016                         | 132.539                | 3866.361                         | 35.341                | 28     |
| 16 | Cyclohexanol                                     | 108-93-0  | 16.84                               | 1223.803                         | 90.715                 | 3885.775                         | 30.118                | 28     |
| 17 | 3-Amino-1,1,1-trifluoropropanol                  | 431-38-9  | 12.29                               | 1246.635                         | 227.779                | 3847.077                         | 54.495                | 30     |
| 18 | Hexafluoro-2-methylisopropanol                   | 1515-14-6 | 9.60                                | 1294.952                         | 211.274                | 3862.603                         | 71.173                | 31     |
| 19 | Hexafluoroisopropanol                            | 920-66-1  | 9.30                                | 1279.124                         | 250.349                | 3867.115                         | 91.578                | 31     |
| 20 | Perfluorotertbutanol                             | 2378-02-1 | 5.20                                | 1355.065                         | 212.430                | 3839.789                         | 103.032               | 31     |
| 21 | 1,1-Bistrifluoromethyl-2,2,2-trichloroethanol    | 7594-49-2 | 5.10                                | 1397.959                         | 229.161                | 3814.020                         | 82.778                | 31     |
| 22 | 1,1,1-Trifluoro-2-propanol                       | 374-01-6  | 11.80                               | 1250.678                         | 145.136                | 3864.845                         | 60.251                | 32     |
| 23 | 2-Propenol                                       | 107-18-6  | 15.52                               | 1193.635                         | 239.786                | 3874.678                         | 36.535                | 32     |
| 24 | 1,2,3,4-Butanetetrol                             | 149-32-6  | 13.90                               | 1213.811                         | 34.661                 | 3874.077                         | 47.250                | 29     |
| 25 | Butanol                                          | 71-36-3   | 16.10                               | 1214.823                         | 186.036                | 3887.177                         | 32.315                | 29     |
| 26 | 2,2,3,3,3-Pentafluoro-1-propanol (2:1FTOH)       | 422-05-9  | 11.35                               | 1259.863                         | 180.539                | 3861.983                         | 63.331                | 29     |
| 27 | 1-Chloro-1,1,3,3-tetrafluoropropane              |           | 7.90                                | 1460.701                         | 148.329                | 3834.932                         | 90.088                | 29     |
| 28 | Hexafluoropropane-2,2-diol                       | 677-71-4  | 6.58                                | 1475.555                         | 220.339                | 3857.304                         | 131.099               | 29     |
| 29 | 1,1,3-Trichloro-1,3,3-trifluoropropane-2,2-diol  |           | 6.48                                | 1465.232                         | 262.386                | 3837.372                         | 84.677                | 29     |
| 30 | 1,1,3,3-Tetrachloro-1,3-difluoropropane-2,2-diol | 677-70-3  | 6.42                                | 1466.674                         | 226.130                | 3849.099                         | 89.497                | 29     |
| 31 | 1,1,3,3-Tetrafluoropropane-2,2-diol              |           | 8.79                                | 1480.390                         | 190.339                | 3817.332                         | 70.890                | 29     |
| 32 | 1,1,3,3-Tetrafluoro-1,3-dichloropropane-2,2-diol |           | 6.67                                | 1461.649                         | 255.259                | 3837.017                         | 86.904                | 29     |

| #  | Chemical                                    | CAS #    | Exp. pKa | $\nu_{CO^-}$ (cm <sup>-1</sup> ) | IR <sub>Int, CO-</sub> | $\nu_{FTOH}$ (cm <sup>-1</sup> ) | IR <sub>Int, OH</sub> | Source |
|----|---------------------------------------------|----------|----------|----------------------------------|------------------------|----------------------------------|-----------------------|--------|
| 33 | 1,1,1-Trifluoro-3,3-dibromopropane-2,2-diol |          | 7.69     | 1476.616                         | 247.082                | 3837.667                         | 100.375               | 29     |
| 34 | 2,2,3,3-tetrafluoro-1-propanol              | 76-37-9  | 12.74    | 1255.800                         | 243.845                | 3909.715                         | 72.949                | 29     |
| 35 | 2,2-Dichloroethanol                         | 598-38-9 | 12.89    | 1303.953                         | 141.462                | 3919.200                         | 72.511                | 29     |
| 36 | 2,2-Difluoroethanol                         | 359-13-7 | 12.00    | 1264.557                         | 247.230                | 3924.976                         | 62.452                | 29     |
| 37 | 1,2-Ethanediol                              | 107-21-1 | 15.10    | 1183.034                         | 93.090                 | 3875.570                         | 39.130                | 29     |
| 38 | Glycerol                                    | 56-81-5  | 14.15    | 1181.428                         | 99.468                 | 3907.875                         | 62.876                | 29     |
| 39 | Propyleneglycol                             | 57-55-6  | 14.90    | 1179.325                         | 214.178                | 3893.756                         | 34.942                | 29     |

**Table S12.** Estimated pKa of fluorinated betaines compiled from different models/sources and calculated using the Betaines QSAR (Table 3).

| Chemical             | CAS Number | $\nu_{COO^-}$ | IR <sub>Int</sub> | Estimated pKa |                       |       |             |
|----------------------|------------|---------------|-------------------|---------------|-----------------------|-------|-------------|
|                      |            |               |                   | VF Model      | NN – Pan et al., 2021 | SPARC | Chemicalize |
| 1-1 <sup>a</sup>     |            | 1802.119      | 624.781           | 1.73          | 1.90                  | 2.32  | 3.26        |
| 1-1PF                |            | 1817.098      | 626.669           | 1.23          | 1.60                  | 1.82  | 2.31        |
| 1-2PF                |            | 1823.193      | 615.837           | 1.02          | 1.70                  | 1.67  | 2.22        |
| 1-3PF                |            | 1822.711      | 576.099           | 1.04          | 1.70                  | 1.60  | 1.78        |
| 1-4PF                |            | 1823.105      | 574.738           | 1.03          | 1.70                  | 1.57  | 0.98        |
| 1-2Trifluoroethyl    |            | 1807.744      | 613.088           | 1.54          | 1.70                  | 2.14  | 2.73        |
| 1-2Pentafluoropropyl |            | 1806.646      | 657.809           | 1.58          | 1.70                  | 2.07  | 2.51        |
| 1-2Heptafluorobutyl  |            | 1807.967      | 668.631           | 1.53          | 1.70                  | 2.04  | 2.02        |

<sup>a</sup> Non-fluorinated betaine; used to compare models with the experimental pKa.

**Table S13.** Estimated pKa of per- and polyfluoroalkyl sulfonic acids compiled from different models/sources and calculated using the Sulfonic Acids QSAR (Table 3).

| Chemical            | CAS Number  | $\nu_{SO_3^-}$ | Estimated pKa |                       |                          |       |             |       |
|---------------------|-------------|----------------|---------------|-----------------------|--------------------------|-------|-------------|-------|
|                     |             |                | VF Model      | NN – Pan et al., 2021 | QC -Rayne & Forest, 2010 | SPARC | Chemicalize | OPERA |
| PFMS                | 1493-13-6   | 1250.669       | -5.51         | -3.40                 | -5.80                    | 0.98  | -3.43       | 0.03  |
| PFES                | 354-88-1    | 1242.154       | -5.05         | -3.00                 | -5.80                    | 0.14  | -3.31       | -0.13 |
| PFP <sub>r</sub> S  | 423-41-6    | 1261.901       | -6.11         | -2.80                 | -5.50                    | 0.14  | -3.31       | -0.49 |
| PFBS                | 375-73-5    | 1266.474       | -6.36         | -2.90                 | -5.50                    | 0.14  | -3.31       | -1.61 |
| PFPeS               | 2706-91-4   | 1240.307       | -4.95         | -2.90                 | -5.50                    | 0.14  | -3.32       | -1.77 |
| PFH <sub>x</sub> S  | 355-46-4    | 1261.594       | -6.10         | -2.90                 | -5.50                    | 0.14  | -3.32       | -1.64 |
| PFHpS               | 375-92-8    | 1256.465       | -5.82         | -2.90                 | -5.50                    | 0.14  | -3.32       | -1.81 |
| PFOS                | 1763-23-1   | 1256.743       | -5.84         | -2.90                 | -5.50                    | 0.14  | -3.32       | -1.64 |
| PFNS                | 68259-12-1  | 1255.673       | -5.78         | -2.80                 |                          | 0.14  | -3.24       | -1.68 |
| 4:2F <sub>T</sub> S | 757124-72-4 | 1176.173       | -1.51         | 1.40                  |                          | 0.36  | -2.64       | 0.93  |
| 6:2F <sub>T</sub> S | 27619-97-2  | 1172.621       | -1.32         | 1.40                  |                          | 0.36  | -2.72       | 1.23  |

**Table S14.** Estimated pKa of PFPA compiled from different models/sources and calculated using the Phosphonic Acids QSAR (Table 3).

| Chemical | CAS Number  | $\nu_{HPO_3^-}$ | Estimated pKa |                       |       |             |       |
|----------|-------------|-----------------|---------------|-----------------------|-------|-------------|-------|
|          |             |                 | VF Model      | NN – Pan et al., 2021 | SPARC | Chemicalize | OPERA |
| PFMP     | 374-09-4    | 1314.145        | 0.75          | 0.70                  | 0.34  | -0.06       | 0.55  |
| PFEP     | 103305-01-7 | 1312.900        | 0.79          | 0.90                  | -0.03 | 0.41        | 0.27  |
| PFPrP    |             | 1320.583        | 0.55          | 0.90                  | -0.07 | 0.46        | -0.67 |
| PFBP     | 52299-24-8  | 1320.382        | 0.56          | 0.90                  | -0.16 | 0.46        | -1.71 |
| PFPeP    |             | 1318.774        | 0.61          | 0.90                  | -0.20 | 0.46        | -2.74 |
| PFHxP    | 40143-76-8  | 1318.924        | 0.60          | 0.90                  | -0.22 | 0.46        | -2.52 |
| PFHpP    |             | 1318.317        | 0.62          | 0.90                  | -0.23 | 0.46        | -2.63 |

**Table S15.** Estimated pKa of sulfonamides compiled from different models/sources and calculated using the Sulfonamides QSAR (Table 3).

| Chemical | CAS Number | $\nu_{SO_2^-}$ | IR <sub>int</sub> | Estimated pKa |                       |       |             |       |
|----------|------------|----------------|-------------------|---------------|-----------------------|-------|-------------|-------|
|          |            |                |                   | VF Model      | NN – Pan et al., 2021 | SPARC | Chemicalize | OPERA |
| PFMSA    | 421-85-2   | 1257.478       | 327.4538          | 5.29          | 6.50                  | 6.10  | 6.19        | 7.04  |
| PFESA    | 78491-70-0 | 1284.859       | 492.9215          | 0.45          | 6.50                  | 6.57  | 2.63        | 7.72  |
| PFPrSA   |            | 1265.561       | 265.3803          | 5.90          | 6.60                  | 6.59  | 3.06        | 7.72  |
| PFBSA    | 30334-69-1 | 1265.680       | 237.5232          | 6.40          | 6.60                  | 6.59  | 3.34        | 6.97  |
| PFPeSA   |            | 1275.231       | 253.3838          | 5.49          | 6.60                  | 6.58  | 3.37        | 6.66  |
| PFHxSA   | 41997-13-1 | 1258.773       | 253.2143          | 6.57          | 6.60                  | 6.57  | 3.37        | 7.05  |
| PFHpSA   |            | 1270.055       | 262.1327          | 5.67          | 6.60                  | 6.57  | 3.37        | 6.54  |
| PFOSA    | 754-91-6   | 1271.171       | 170.3701          | 7.28          | 6.60                  | 6.56  | 3.37        | 6.78  |

**Table S16.** Estimated pKa of FTOH compiled from different models/sources and calculated using the  $\nu_{FTOH}$  QSAR (Table 3).

| Chemical | CAS Number  | $\nu_{FTOH}$ | IR <sub>int</sub> | Estimated pKa |                       |       |             |       |
|----------|-------------|--------------|-------------------|---------------|-----------------------|-------|-------------|-------|
|          |             |              |                   | VF Model      | NN – Pan et al., 2021 | SPARC | Chemicalize | OPERA |
| 1:1FTOH  | 75-89-8     | 3863.723     | 62.859            | 11.40         | 12.30                 | 12.45 | 11.49       | 9.22  |
| 2:1 FTOH | 422-05-9    | 3861.983     | 63.331            | 11.28         | 12.60                 | 12.36 | 12.52       | 9.44  |
| 2:2 FTOH | 54949-74-5  | 3888.438     | 45.978            | 14.23         | 13.80                 | 14.43 | 15.76       | 10.02 |
| 3:2 FTOH | 755-40-8    | 3888.035     | 44.848            | 14.33         | 13.80                 | 14.29 | 15.76       | 9.08  |
| 4:2 FTOH | 2043-47-2   | 3878.906     | 43.976            | 14.04         | 13.80                 | 14.23 | 15.76       | 9.75  |
| 5:2 FTOH | 185689-57-0 | 3888.107     | 48.060            | 14.00         | 13.80                 | 14.21 | 15.76       | 9.78  |
| 6:2 FTOH | 647-42-7    | 3886.248     | 48.076            | 13.92         | 13.80                 | 14.20 | 15.76       | 9.74  |
| 7:2 FTOH | 755-02-2    | 3881.977     | 43.069            | 14.26         | 13.80                 | 14.19 | 15.76       | 9.58  |
| 2:3 FTOH | 148043-73-6 | 3905.514     | 54.399            | 14.07         | 13.80                 | 15.26 | 15.96       |       |
| 2:4 FTOH | 58556-45-9  | 3885.746     | 38.296            | 14.93         | 13.80                 | 15.58 |             |       |
| 2:6 FTOH | 161981-34-6 | 3903.573     | 48.821            | 14.57         | 13.80                 | 15.73 |             |       |

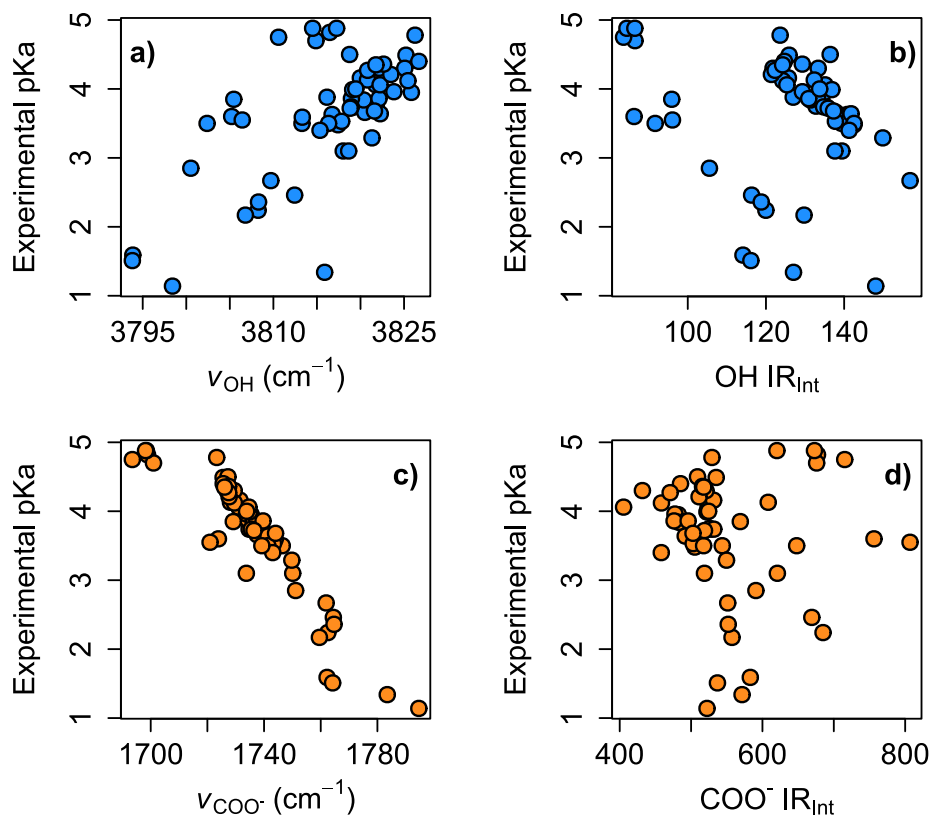

**Figure S1.** Linear correlations between the pKa of a subset of carboxylic acids (#1-59; Table S1) and **a)** the stretching OH vibrational frequency ( $\nu_{\text{OH}}$ ), **b)** the infrared intensity ( $\text{IR}_{\text{Int}}$ ) of the corresponding  $\nu_{\text{OH}}$ , **c)** the antisymmetric stretching  $\text{COO}^-$  vibrational frequency ( $\nu_{\text{COO}^-}$ ), and **d)** the  $\text{IR}_{\text{Int}}$  of the corresponding  $\nu_{\text{COO}^-}$ .

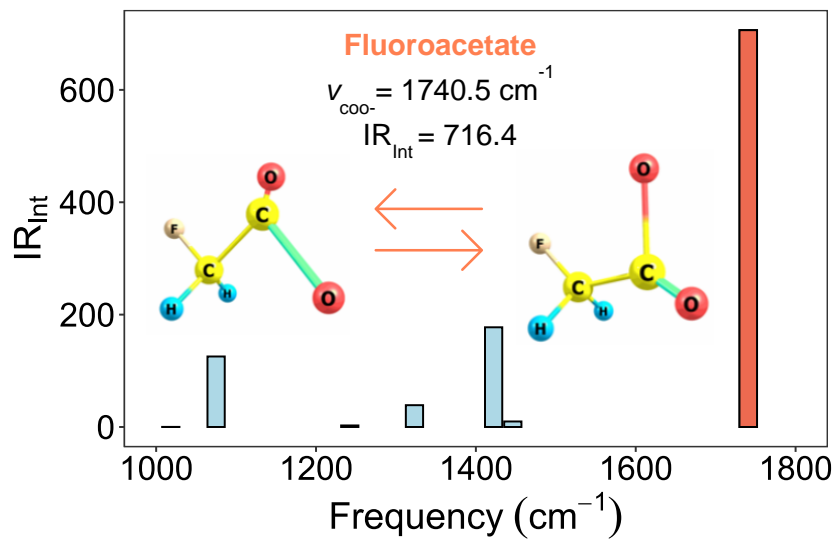

**Figure S2.** Vibrational frequency and  $\text{IR}_{\text{Int}}$  for the antisymmetric  $\text{COO}^-$  stretch of fluoroacetate (in orange) obtained computationally. A graphical representation of this frequency mode is shown in the inset with its corresponding value and  $\text{IR}_{\text{Int}}$ .

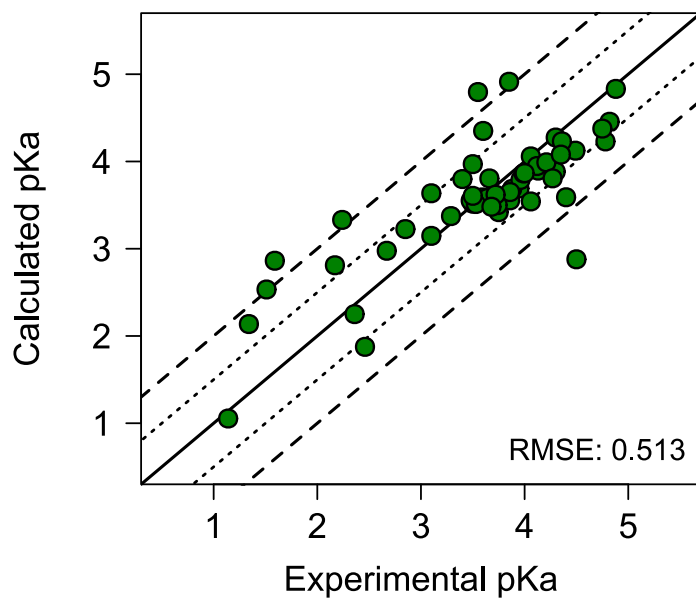

**Figure S3.** Correlation between the experimental and calculated pKa of a subset of carboxylic acids (Table S4) using as predictors symmetric  $\text{COO}^-$  stretching vibrational frequencies ( $\nu_{\text{COO}^-, \text{sym}}$ ) and corresponding  $\text{IR}_{\text{int}}$ .  $a$ ,  $b$ , and  $c$  in  $pKa = a\nu_{\text{COO}^-, \text{sym}} + b\text{IR}_{\text{int}} + c$  are  $(6.11 \pm 0.63) \times 10^{-2}$ ,  $(3.69 \pm 1.04) \times 10^{-3}$ , and  $(-8.23 \pm 0.89) \times 10^1$ . The solid black line shows the 1:1 line, the dotted lines the 0.5 pKa units bounds, and the dashed lines the 1 pKa unit bounds.



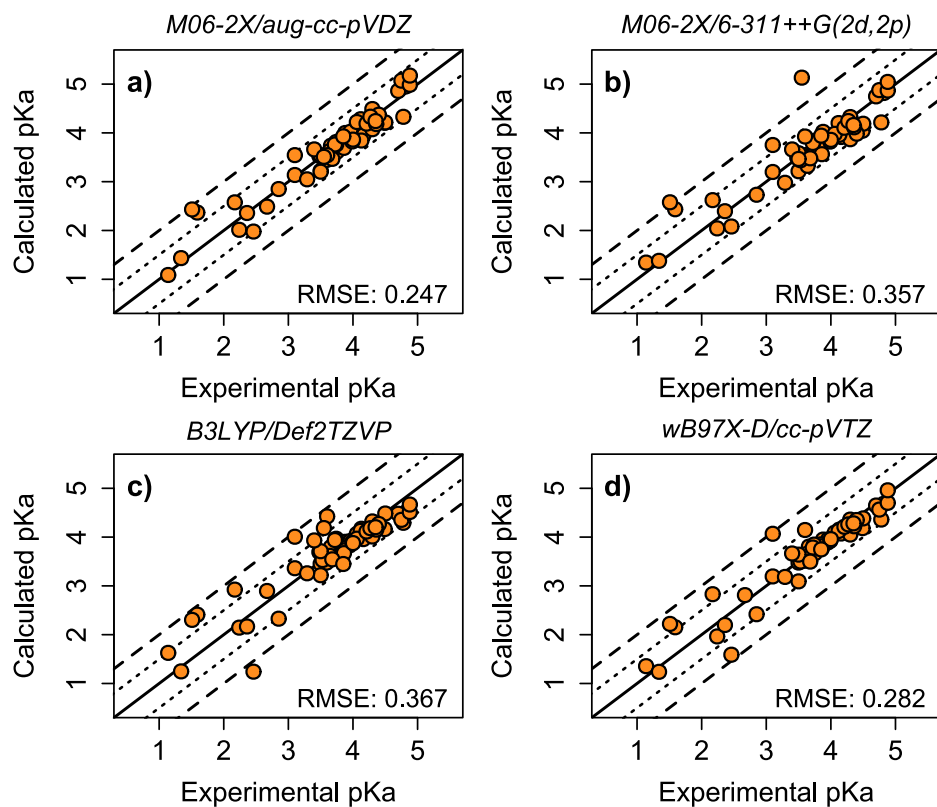

**Figure S4.** Correlations between calculated and experimental pKa of a subset of carboxylic acids (#1-59, Table S1) using different functionals and basis sets.  $\text{COO}^-$  vibrational frequencies ( $\nu_{\text{COO}^-}$ ) and corresponding infrared intensities ( $\text{IR}_{\text{int}}$ ) were used as predictors (Table S4) – see QSARs in Table S5. The values for *M06-2X/aug-cc-pVDZ* are presented in Tables S1 and S3.

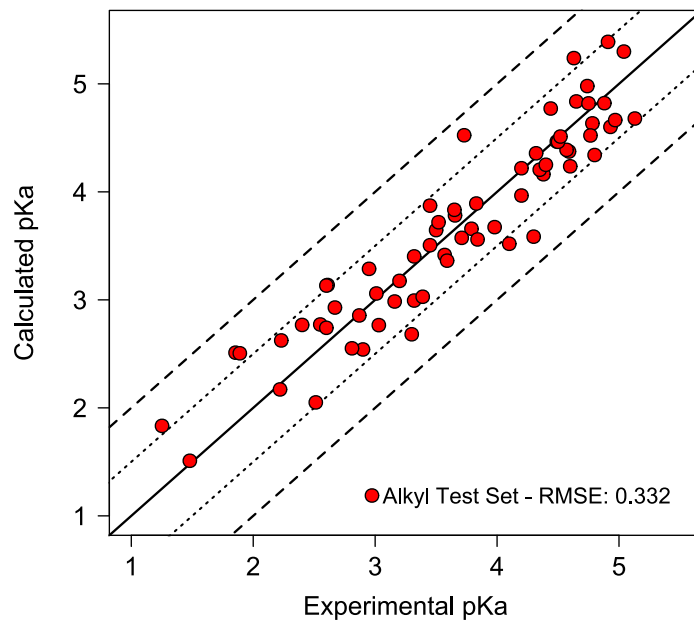

**Figure S5.** Correlation between experimental and calculated pKa of the alkyl carboxylic acids in the validation set ( $n = 67$ ) using its own QSAR where  $a$ ,  $b$ , and  $c$  in  $pKa = av_{COO^-} + bIR_{Int} + c$  are  $(-3.50 \pm 0.16) \times 10^{-2}$ ,  $(-1.35 \pm 0.53) \times 10^{-3}$ , and  $(6.52 \pm 0.29) \times 10^1$ . The solid black line shows the 1:1 line, the dotted lines the 0.5 pKa units bounds, and the dashed lines the 1 pKa unit bounds. The experimental pKa are listed in Table S1.

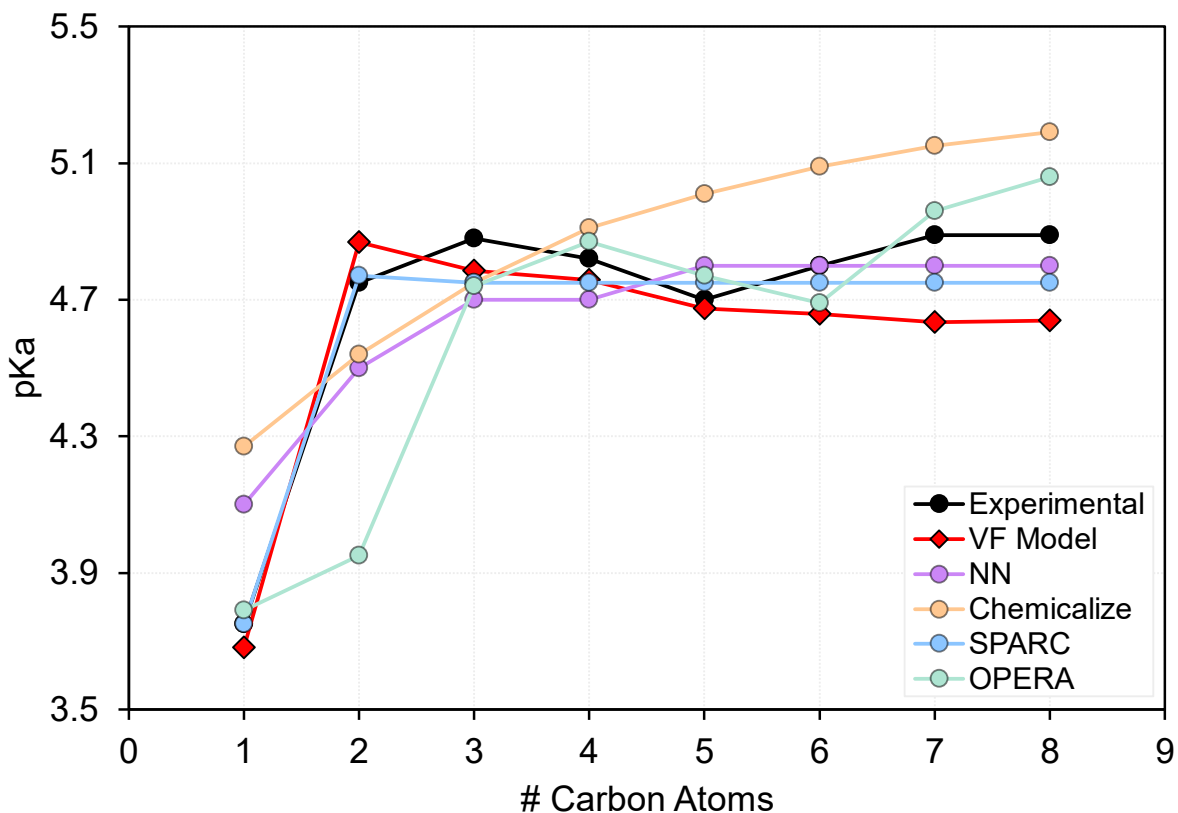

**Figure S6.** Experimental and calculated pKa of non-fluorinated alkyl carboxylic acids with chain lengths of one (formic acid) to eight (octanoic acid) carbons. The experimental pKa can be found in Table S1. The calculated pKa were obtained using the “Alkyl” QSAR of the VF Model, the Neural Network (NN) approach by Pan et al., 2021 (<https://xundrug.cn/molgpka>),<sup>33</sup> Chemicalize by ChemAxon (<https://chemicalize.com>),<sup>34</sup> SPARC calculator by ARChem (<http://archemcalc.com/>), and the OPERA App (accessed through the Chemical Transformation Simulator - <https://qed.epa.gov/cts/>).<sup>35</sup>

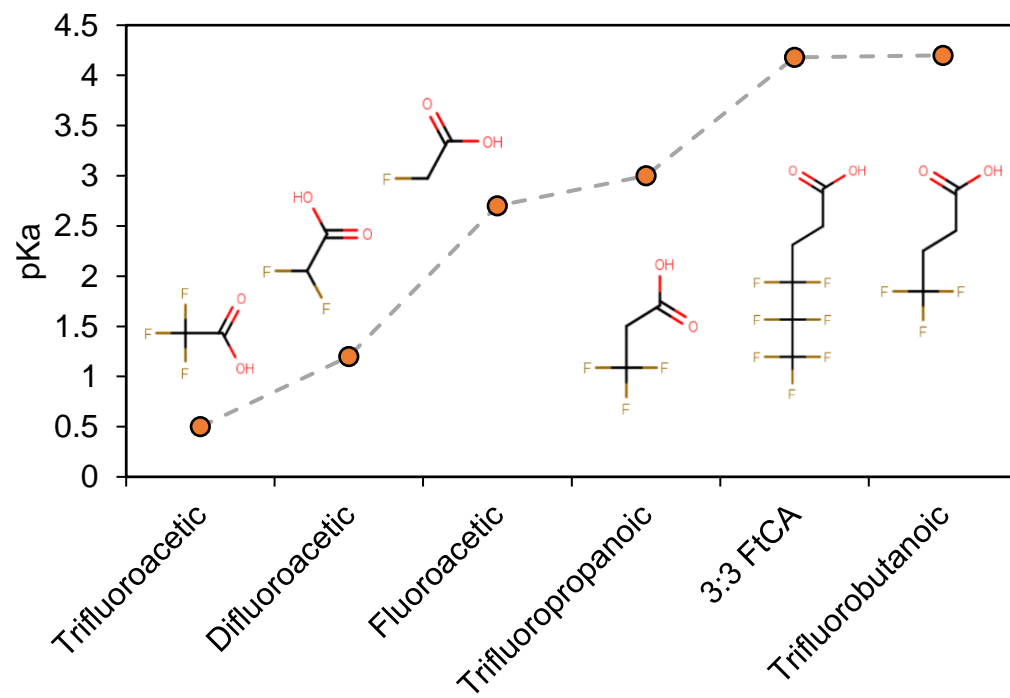

**Figure S7.** Experimental pKa of selected fluorinated carboxylic acids found in Table S1.

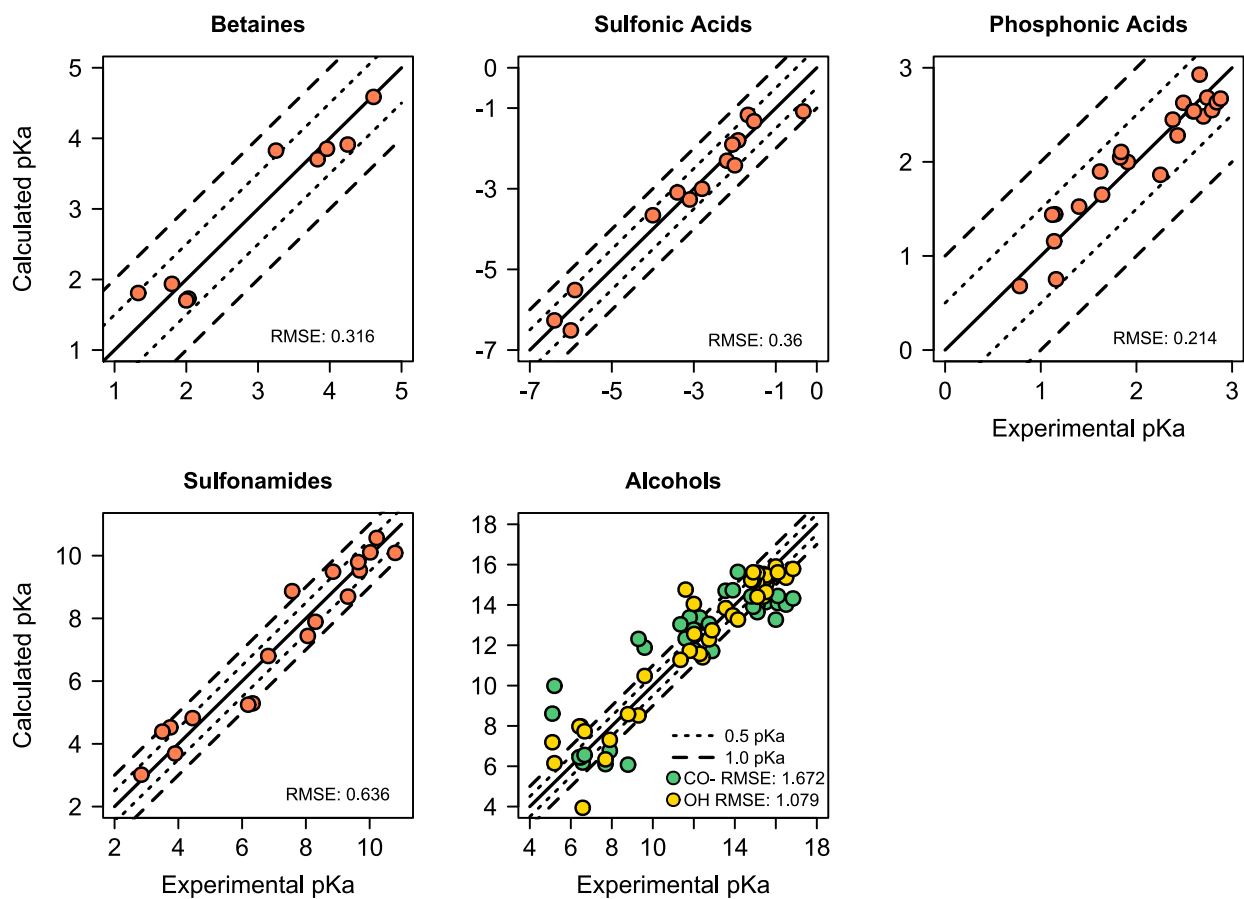

**Figure S8.** Correlations between calculated and experimental pKa of different acids. The QSARs utilized to estimate the pKa are listed in Table 3 of the main text. The experimental pKa, vibrational frequencies and  $IR_{Int}$  are presented in Tables S7 – S11.

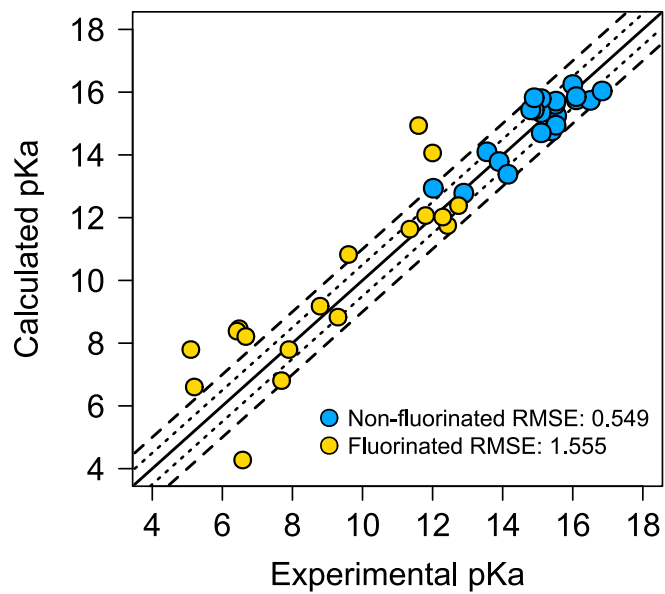

**Figure S9.** Correlation between calculated and experimental pKa of the 39 alcohols listed in Table S11. The QSAR was developed with non-fluorinated alcohols (n: 21) and used to predict the pKa of fluorinated alcohols (n: 18).  $a$ ,  $b$ , and  $c$  in  $pKa = av_{FTOH} + bIR_{Int} + c$  are  $(3.70 \pm 1.13) \times 10^{-2}$ ,  $(-1.06 \pm 0.14) \times 10^{-1}$ , and  $(-1.24 \pm 0.44) \times 10^2$ .

## References

- (1) Abraham, M. H.; Acree, W. E. Equations for the Transfer of Neutral Molecules and Ionic Species from Water to Organic Phases. *J Org Chem* **2010**, *75* (4), 1006–1015. <https://doi.org/10.1021/jo902388n>.
- (2) Dean, J. A.; Lange, N. A. *Lange's Handbook of Chemistry*; Lange's Handbook of Chemistry; McGraw-Hill Professional Publishing, 1998.
- (3) Haynes, W. M. *CRC Handbook of Chemistry and Physics, 93rd Edition*; 100 Key Points; Taylor & Francis, 2012.
- (4) Dutra, F. R.; Silva, C. de S.; Custodio, R. On the Accuracy of the Direct Method to Calculate PKa from Electronic Structure Calculations. *J Phys Chem A* **2021**, *125* (1), 65–73. <https://doi.org/10.1021/acs.jpca.0c08283>.
- (5) Serjeant, E.; Dempsey, B. *Ionisation Constants of Organic Acids in Aqueous Solution*; Pergamon Press: Oxford; New York, 1979.
- (6) Moroi, Y.; Yano, H.; Shibata, O.; Yonemitsu, T. Determination of Acidity Constants of Perfluoroalkanoic Acids. *Bull Chem Soc Jpn* **2001**, *74* (4), 667–672. <https://doi.org/10.1246/bcsj.74.667>.
- (7) Henne, A. L.; Fox, C. J. Ionization Constants of Fluorinated Acids. *J Am Chem Soc* **1951**, *73* (5), 2323–2325. <https://doi.org/10.1021/ja01149a122>.
- (8) Hershfield, Robert.; Schmir, G. L. Hydrolysis of Acyl-Activated Thiol Esters. Acid Catalysis and Acid Inhibition. *J Am Chem Soc* **1973**, *95* (12), 3994–4002. <https://doi.org/10.1021/ja00793a027>.
- (9) Vierke, L.; Berger, U.; Cousins, I. T. Estimation of the Acid Dissociation Constant of Perfluoroalkyl Carboxylic Acids through an Experimental Investigation of Their Water-to-Air Transport. *Environ Sci Technol* **2013**, *47* (19), 11032–11039. <https://doi.org/10.1021/es402691z>.
- (10) Burns, D. C.; Ellis, D. A.; Li, H.; McMurdo, C. J.; Webster, E. Experimental PKa Determination for Perfluorooctanoic Acid (PFOA) and the Potential Impact of PKa Concentration Dependence on Laboratory-Measured Partitioning Phenomena and Environmental Modeling. *Environ Sci Technol* **2008**, *42* (24), 9283–9288. <https://doi.org/10.1021/es802047v>.
- (11) Brace, N. O. Long Chain Alkanoic and Alkenoic Acids with Perfluoroalkyl Terminal Segments 1. *J Org Chem* **1962**, *27* (12), 4491–4498. <https://doi.org/10.1021/jo01059a090>.
- (12) López-Fontán, J. L.; Sarmiento, F.; Schulz, P. C. The Aggregation of Sodium Perfluorooctanoate in Water. *Colloid Polym Sci* **2005**, *283* (8), 862–871. <https://doi.org/10.1007/s00396-004-1228-7>.
- (13) Igarashi, S.; Yotsuyanagi, T. Homogeneous Liquid-Liquid Extraction by PH Dependent Phase Separation with a Fluorocarbon Ionic Surfactant and Its Application to the Preconcentration of Porphyrin Compounds. *Microchimica Acta* **1992**, *106* (1), 37–44. <https://doi.org/10.1007/BF01242697>.
- (14) Feehan, J. F.; Monaghan, J.; Gill, C. G.; Krogh, E. T. Direct Measurement of Acid Dissociation Constants of Trace Organic Compounds at Nanomolar Levels in Aqueous Solution by Condensed Phase–Membrane Introduction Mass Spectrometry. *Environ Toxicol Chem* **2019**, *38* (9), 1879–1889. <https://doi.org/https://doi.org/10.1002/etc.4519>.

- (15) Cheng, J.; Psillakis, E.; Hoffmann, M. R.; Colussi, A. J. Acid Dissociation versus Molecular Association of Perfluoroalkyl Oxoacids: Environmental Implications. *J Phys Chem A* **2009**, *113* (29), 8152–8156. <https://doi.org/10.1021/jp9051352>.
- (16) Weers, J. G.; Rathman, J. F.; Axe, F. U.; Crichlow, C. A.; Foland, L. D.; Scheuing, D. R.; Wiersema, R. J.; Zielske, A. G. Effect of the Intramolecular Charge Separation Distance on the Solution Properties of Betaines and Sulfobetaines. *Langmuir* **1991**, *7* (5), 854–867. <https://doi.org/10.1021/la00053a008>.
- (17) Fei, Z.; Zhao, D.; Geldbach, T. J.; Scopelliti, R.; Dyson, P. J. Brønsted Acidic Ionic Liquids and Their Zwitterions: Synthesis, Characterization and PKa Determination. *Chemistry – A European Journal* **2004**, *10* (19), 4886–4893. <https://doi.org/https://doi.org/10.1002/chem.200400145>.
- (18) Covington, A. K.; Thompson, R. Ionization of Moderately Strong Acids in Aqueous Solution. Part III. Methane-, Ethane-, and Propanesulfonic Acids at 25 Degrees C. *J Solution Chem* **1974**, *3* (8), 603-617.
- (19) Guthrie, J. P. Hydrolysis of Esters of Oxy Acids: PKa Values for Strong Acids; Brønsted Relationship for Attack of Water at Methyl; Free Energies of Hydrolysis of Esters of Oxy Acids; and a Linear Relationship between Free Energy of Hydrolysis and PKa Holding over a Range of 20 PK Units. *Can J Chem* **1978**, *56* (17), 2342–2354. <https://doi.org/10.1139/v78-385>.
- (20) Jiao, G.; Liu, S.; He, B.; Tang, Z.; Ji, X. Preparation Method of Micafungin Sodium. EP2708533A1, May 11, 2012.
- (21) Black, S. N.; Collier, E. A.; Davey, R. J.; Roberts, R. J. Structure, Solubility, Screening, and Synthesis of Molecular Salts. *J Pharm Sci* **2007**, *96* (5), 1053–1068. <https://doi.org/10.1002/jps.20927>.
- (22) Pospichal, J.; Gebauer, P.; Bocek, P. Measurement of Mobilities and Dissociation Constants by Capillary Isotachopheresis. *Chem Rev* **1989**, *89* (2), 419–430. <https://doi.org/10.1021/cr00092a011>.
- (23) Freedman, L. D.; Doak, G. O. The Preparation And Properties Of Phosphonic Acids. *Chem Rev* **1957**, *57* (3), 479–523. <https://doi.org/10.1021/cr50015a003>.
- (24) Ohta, K. Prediction of PKa Values of Alkylphosphonic Acids. *Bull Chem Soc Jpn* **1992**, *65* (9), 2543–2545. <https://doi.org/10.1246/bcsj.65.2543>.
- (25) Trepka, R. D.; Belisle, J. W.; Harrington, J. K. Acidities and Partition Coefficients of Fluoromethanesulfonamides. *J Org Chem* **1974**, *39* (8), 1094–1098. <https://doi.org/10.1021/jo00922a017>.
- (26) Parman, E.; Toom, L.; Selberg, S.; Leito, I. Determination of PKa Values of Fluorocompounds in Water Using 19F NMR. *J Phys Org Chem* **2019**, *32* (6), e3940. <https://doi.org/https://doi.org/10.1002/poc.3940>.
- (27) Cammarata, A.; Allen, R. C. Observations Concerning the Correlation of In Vitro Sulfonamide Activity with PKa and the Hammett Values. *J Pharm Sci* **1967**, *56* (5), 640–642. <https://doi.org/https://doi.org/10.1002/jps.2600560521>.



- (28) Thapa, B.; Schlegel, H. B. Improved PKa Prediction of Substituted Alcohols, Phenols, and Hydroperoxides in Aqueous Medium Using Density Functional Theory and a Cluster-Continuum Solvation Model. *J Phys Chem A* **2017**, *121* (24), 4698–4706. <https://doi.org/10.1021/acs.jpca.7b03907>.
- (29) Baldasare, C. A.; Seybold, P. G. Computational Estimation of the Aqueous Acidities of Alcohols, Hydrates, and Enols. *J Phys Chem A* **2021**, *125* (17), 3600–3605. <https://doi.org/10.1021/acs.jpca.1c01330>.
- (30) ROBERTS, C. W.; McBEE, E. T.; HATHAWAY, C. E. The Potentiometric Titration of Fluorinated Alcohols in Aqueous and Non-Aqueous Systems. *J Org Chem* **1956**, *21* (12), 1369–1370. <https://doi.org/10.1021/jo01118a008>.
- (31) Filler, R.; Schure, R. M. Highly Acidic Perhalogenated Alcohols. A New Synthesis of Perfluoro-Tert-Butyl Alcohol. *J Org Chem* **1967**, *32* (4), 1217–1219. <https://doi.org/10.1021/jo01279a081>.
- (32) Williams, R. *pKa Data compiled by R. Williams. University of Wisconsin-Madison*. [https://www.chem.wisc.edu/areas/reich/pkatable/pKa\\_compilation-1-Williams.pdf](https://www.chem.wisc.edu/areas/reich/pkatable/pKa_compilation-1-Williams.pdf).
- (33) Pan, X.; Wang, H.; Li, C.; Zhang, J. Z. H.; Ji, C. MolGpka: A Web Server for Small Molecule PKa Prediction Using a Graph-Convolutional Neural Network. *J Chem Inf Model* **2021**, *61* (7), 3159–3165. <https://doi.org/10.1021/acs.jcim.1c00075>.
- (34) Swain, M. Chemicalize.Org. *J Chem Inf Model* **2012**, *52* (2), 613–615. <https://doi.org/10.1021/ci300046g>.
- (35) Mansouri, K.; Cariello, N. F.; Korotcov, A.; Tkachenko, V.; Grulke, C. M.; Sprankle, C. S.; Allen, D.; Casey, W. M.; Kleinstreuer, N. C.; Williams, A. J. Open-Source QSAR Models for PKa Prediction Using Multiple Machine Learning Approaches. *J Cheminform* **2019**, *11* (1), 60. <https://doi.org/10.1186/s13321-019-0384-1>.
